# Supplementary material for: Carbohydrate Sequence of the Prostate Cancer-associated Antigen F77 Assigned by a Mucin O-Glycome Designer Array
Source: PubMed Central journal article supplement (PMC4047413; doi:10.1074/jbc.m114.558932), 2014-04-21
Supplement: supp_M114.558932_jbc.M114.558932-1.pdf [file supp_M114.558932_jbc.M114.558932-1.pdf]

**Supplemental Tables S1-4**

**Carbohydrate sequence of the prostate cancer-associated antigen F77 assigned by  
a mucin O-glycome designer array**

**Chao Gao, Yan Liu, Hongtao Zhang, Yibing Zhang, Michiko N. Fukuda, Angelina S. Palma,  
Radoslaw P. Kozak, Robert A. Childs, Motohiro Nonaka, Zhen Li, Don L. Siegel,  
Peter Hanfland, Donna M. Peehl, Wengang Chai, Mark I. Greene, Ten Feizi**

Supplemental Table S1 Oligosaccharide probes included in the microarray and the binding signals (means of the fluorescence intensity) elicited with mAb F77 and 89-F anti-B at 5 fmol probe per spot (taken from Fig 2)

| Pos <sup>a</sup>                             | Probe <sup>b</sup>  | Sequence                                                              | Binding signals<br>(5fmol/probe spot) |        |
|----------------------------------------------|---------------------|-----------------------------------------------------------------------|---------------------------------------|--------|
|                                              |                     |                                                                       | F77                                   | Anti-B |
| <b>Lactose and N-acetyllactosamine-based</b> |                     |                                                                       |                                       |        |
| 1                                            | Galactocerebrosides | Gal $\beta$ -Cer                                                      | 15                                    | 191    |
| 2                                            | H-Di                | Fuc $\alpha$ -2Gal                                                    | - <sup>c</sup>                        | -      |
| 3                                            | A-Tri               | GalNAc $\alpha$ -3Gal<br> <br>Fuc $\alpha$ -2                         | -                                     | -      |
| 4                                            | B-Tri               | Gal $\alpha$ -3Gal<br> <br>Fuc $\alpha$ -2                            | -                                     | 3      |
| 5                                            | B-Tri-AO            | Gal $\alpha$ -3Gal-AO<br> <br>Fuc $\alpha$ -2                         | -                                     | -      |
| 6                                            | GSC-426             | 3-deoxy, 3-carboxymethyl-Gal $\beta$ -C30                             | -                                     | -      |
| 7                                            | Sulfatide           | SU-3Gal $\beta$ -Cer                                                  | -                                     | -      |
| 8                                            | GSF-1               | SU-3Gal $\beta$ -C30                                                  | -                                     | -      |
| 9                                            | GSC-209             | GlcA $\beta$ -3Gal $\beta$ -Cer42                                     | -                                     | -      |
| 10                                           | GSC-210             | SU-3GlcA $\beta$ -3Gal $\beta$ -Cer42                                 | -                                     | -      |
| 11                                           | GSC-187             | NeuAc $\alpha$ -3Gal $\beta$ -C29                                     | -                                     | -      |
| 12                                           | GSC-40              | NeuAc $\alpha$ - (S) -3Gal $\beta$ -Cer42                             | -                                     | -      |
| 13                                           | GSC-230             | NeuAc $\alpha$ -8NeuAc $\alpha$ -3Gal $\beta$ -Cer36                  | -                                     | -      |
| 14                                           | GSC-27              | NeuAc $\alpha$ -6Gal $\beta$ -Cer36                                   | -                                     | -      |
| 15                                           | GSC-144             | KDN $\alpha$ -6Gal $\beta$ -Cer36                                     | -                                     | -      |
| 16                                           | GSC-13              | NeuAc $\alpha$ - (S) -6Gal $\beta$ -Cer36                             | -                                     | -      |
| 17                                           | GSC-72              | NeuAc $\alpha$ - (S) -6Gal $\beta$ - (S) -Cer36                       | -                                     | -      |
| 18                                           | GSC-231             | NeuAc $\alpha$ -8NeuAc $\alpha$ -6Gal $\beta$ -Cer36                  | -                                     | -      |
| 19                                           | GSC-439             | NeuAc $\alpha$ -8NeuAc $\alpha$ -8NeuAc $\alpha$ -6Gal $\beta$ -Cer36 | -                                     | -      |
| 20                                           | Glucocerebrosides   | Glc $\beta$ -Cer?                                                     | -                                     | -      |
| 21                                           | GSF-19              | SU-6Glc $\beta$ -C30                                                  | -                                     | -      |
| 22                                           | GSC-60              | NeuAc $\alpha$ -6Glc $\beta$ -Cer36                                   | -                                     | -      |
| 23                                           | GSC-9               | NeuAc $\alpha$ - (S) -6Glc $\beta$ -Cer36                             | -                                     | -      |
| 24                                           | GSC-62              | NeuAc $\alpha$ -2Glc $\beta$ -Cer36                                   | -                                     | -      |

|    |                                     |                                                                                  |   |   |
|----|-------------------------------------|----------------------------------------------------------------------------------|---|---|
| 25 | GSC-59                              | NeuAc $\alpha$ -6GlcNAc $\beta$ -Cer36                                           | - | - |
| 26 | GSC-95                              | NeuAc $\alpha$ -(S)-6GlcNAc $\beta$ -Cer36                                       | - | - |
| 27 | GSC-232                             | NeuAc $\alpha$ -8NeuAc $\alpha$ -6Glc $\beta$ -Cer36                             | - | - |
| 28 | Lactocerebrosides                   | Gal $\beta$ -4Glc $\beta$ -Cer                                                   | - | - |
| 29 | Lac                                 | Gal $\beta$ -4Glc                                                                | - | - |
| 30 | Lac-AO                              | Gal $\beta$ -4Glc-AO                                                             | - | - |
| 31 | GSC-432                             | 3-deoxy, 3-carboxymethyl-Gal $\beta$ -4Glc $\beta$ -C30                          | - | - |
| 32 | GSC-296                             | GlcA $\beta$ -3Gal $\beta$ -4Glc $\beta$ -C30                                    | - | - |
| 33 | GSC-353                             | SU-3GlcA $\beta$ -3Gal $\beta$ -4Glc $\beta$ -C30                                | - | - |
| 34 | GalNAc $\alpha$ -3Gal $\beta$ -4Glc | GalNAc $\alpha$ -3Gal $\beta$ -4Glc                                              | - | - |
| 35 | Globotri-AO                         | Gal $\alpha$ -4Gal $\beta$ -4Glc $\beta$ -AO                                     | - | - |
| 36 | Ceramide trihexoside                | Gal $\alpha$ -4Gal $\beta$ -4Glc $\beta$ -Cer                                    | - | - |
| 37 | Globoside (P-antigen)               | GalNAc $\beta$ -3Gal $\alpha$ -4Gal $\beta$ -4Glc $\beta$ -Cer                   | - | - |
| 38 | Forssmann glycolipid                | GalNAc $\alpha$ -3GalNAc $\beta$ -3Gal $\alpha$ -4Gal $\beta$ -4Glc $\beta$ -Cer | - | - |
| 39 | Fuc(3)-Lac-AO                       | Gal $\alpha$ -4Gal-AO<br> <br>Fuca-3                                             | - | - |
| 40 | GSC-430                             | 3-deoxy, 3-carboxymethyl-Gal $\beta$ -3Glc $\beta$ -C30<br> <br>Fuca-4           | - | - |
| 41 | GSC-260                             | 3-deoxy, 3-carboxymethyl-Gal $\beta$ -4Glc $\beta$ -C30<br> <br>Fuca-3           | - | - |
| 42 | GSC-150                             | SU-3Gal $\beta$ -4Glc $\beta$ -C30<br> <br>Fuca-3                                | - | - |
| 43 | GSC-160                             | SU-3Gal $\beta$ -4Glc $\beta$ -Cer36<br> <br>Fuca-3                              | - | - |
| 44 | NeuAc $\alpha$ -(3')Lac             | NeuAc $\alpha$ -3Gal $\beta$ -4Glc                                               | - | - |
| 45 | NeuAc $\alpha$ -(3')Lac-AO          | NeuAc $\alpha$ -3Gal $\beta$ -4Glc-AO                                            | - | - |
| 46 | Neu4,5Ac-(3')Lac                    | Neu4,5Ac $\alpha$ -3Gal $\beta$ -4Glc                                            | - | - |
| 47 | Neu4,5Ac-(3')Lac-AO                 | Neu4,5Ac $\alpha$ -3Gal $\beta$ -4Glc-AO                                         | - | - |
| 48 | GSC-16                              | NeuAc $\alpha$ -3Gal $\beta$ -4Glc $\beta$ -Cer32                                | - | - |
| 49 | GSC-178                             | NeuAc $\alpha$ -3Gal $\beta$ -4Glc $\beta$ -Cer34                                | - | - |
| 50 | GSC-17                              | NeuAc $\alpha$ -3Gal $\beta$ -4Glc $\beta$ -Cer36                                | - | - |
| 51 | GSC-18                              | NeuAc $\alpha$ -3Gal $\beta$ -4Glc $\beta$ -Cer42                                | - | - |
| 52 | GSC-197                             | KDN $\alpha$ -3Gal $\beta$ -4Glc $\beta$ -Cer28                                  | - | - |
| 53 | GSC-199                             | KDN $\alpha$ -3Gal $\beta$ -4Glc $\beta$ -C30                                    | - | - |

|    |                            |                                                                                     |   |   |
|----|----------------------------|-------------------------------------------------------------------------------------|---|---|
| 54 | GSC-198                    | KDN $\alpha$ -3Gal $\beta$ -4Glc $\beta$ -Cer34                                     | - | - |
| 55 | GSC-75                     | (4-deoxy) NeuAc $\alpha$ -3Gal $\beta$ -4Glc $\beta$ -Cer36                         | - | - |
| 56 | GSC-76                     | (7-deoxy) NeuAc $\alpha$ -3Gal $\beta$ -4Glc $\beta$ -Cer36                         | - | - |
| 57 | GSC-77                     | (8-deoxy) NeuAc $\alpha$ -3Gal $\beta$ -4Glc $\beta$ -Cer36                         | - | - |
| 58 | GSC-153                    | (4, 8-deoxy) NeuAc $\alpha$ -3Gal $\beta$ -4Glc $\beta$ -Cer36                      | - | - |
| 59 | GSC-51                     | (9-deoxy) NeuAc $\alpha$ -3Gal $\beta$ -4Glc $\beta$ -Cer36                         | - | - |
| 60 | GSC-78                     | (4-OMe) NeuAc $\alpha$ -3Gal $\beta$ -4Glc $\beta$ -Cer36                           | - | - |
| 61 | GSC-79                     | (9-OMe) NeuAc $\alpha$ -3Gal $\beta$ -4Glc $\beta$ -Cer36                           | - | - |
| 62 | GSC-23                     | (C7) NeuAc $\alpha$ -3Gal $\beta$ 1-4Glc $\beta$ -Cer36                             | - | - |
| 63 | GSC-24                     | (C8) NeuAc $\alpha$ -3Gal $\beta$ 1-4Glc $\beta$ -Cer36                             | - | - |
| 64 | GSC-50                     | (C8 diastereoisomer) NeuAc $\alpha$ -3Gal $\beta$ -4Glc $\beta$ -Cer36              | - | - |
| 65 | GSC-229                    | NeuAc $\alpha$ -8NeuAc $\alpha$ -3Gal $\beta$ -4Glc $\beta$ -Cer36                  | - | - |
| 66 | GSC-96                     | NeuAc $\alpha$ -9NeuAc $\alpha$ -3Gal $\beta$ -4Glc $\beta$ -Cer36                  | - | - |
| 67 | GSC-437                    | NeuAc $\alpha$ -8NeuAc $\alpha$ -8NeuAc $\alpha$ -3Gal $\beta$ -4Glc $\beta$ -Cer36 | - | - |
| 68 | Neu $\alpha$ -(3')Lac      | Neu $\alpha$ -3Gal $\beta$ -4Glc                                                    | - | - |
| 69 | Neu $\alpha$ -(3')Lac-AO   | Neu $\alpha$ -3Gal $\beta$ -4Glc-AO                                                 | - | - |
| 70 | NeuAc $\alpha$ -(6')Lac    | NeuAc $\alpha$ -6Gal $\beta$ -4Glc                                                  | - | - |
| 71 | NeuAc $\alpha$ -(6')Lac-AO | NeuAc $\alpha$ -6Gal $\beta$ -4Glc-AO                                               | - | - |
| 72 | GSC-61                     | NeuAc $\alpha$ -6Gal $\beta$ -4Glc $\beta$ -Cer36                                   | - | - |
| 73 | GSC-12                     | NeuAc $\alpha$ - (S) -6Gal $\beta$ -4Glc $\beta$ -Cer36                             | - | - |
| 74 | GSC-234                    | NeuAc $\alpha$ - (S) -6Gal (S) $\beta$ -4Glc $\beta$ -Cer36                         | - | - |
| 75 | GSC-73                     | NeuAc $\alpha$ - (S) -6Gal $\beta$ -4Glc $\beta$ - (S) -Cer36                       | - | - |
| 76 | Neu $\alpha$ -(6')Lac      | Neu $\alpha$ -6Gal $\beta$ -4Glc                                                    | - | - |
| 77 | Neu $\alpha$ -(6')Lac-AO   | Neu $\alpha$ -6Gal $\beta$ -4Glc-AO                                                 | - | - |
| 78 | NeuAc $\beta$ -(3')Lac     | NeuAc $\beta$ -3Gal $\beta$ -4Glc                                                   | - | - |
| 79 | NeuAc $\beta$ -(3')Lac-AO  | NeuAc $\beta$ -3Gal $\beta$ -4Glc-AO                                                | - | - |
| 80 | NeuAc $\beta$ -(6')Lac     | NeuAc $\beta$ -6Gal $\beta$ -4Glc                                                   | - | - |
| 81 | NeuAc $\beta$ -(6')Lac-AO  | NeuAc $\beta$ -6Gal $\beta$ -4Glc-AO                                                | - | - |
| 82 | GSC-161                    | NeuAc $\alpha$ -3Gal $\beta$ -4Glc $\beta$ -C30<br> <br>Fuc $\alpha$ -3             | - | - |
| 83 | GSC-162                    | NeuAc $\alpha$ -3Gal $\beta$ -4Glc $\beta$ -Cer36<br> <br>Fuc $\alpha$ -3           | - | - |
| 84 | LacNAc(1-3)                | Gal $\beta$ -3GlcNAc                                                                | - | - |
| 85 | LacNAc(1-3)-AO             | Gal $\beta$ -3GlcNAc-AO                                                             | - | - |

|     |                                     |                                                                  |    |   |
|-----|-------------------------------------|------------------------------------------------------------------|----|---|
| 86  | LacNAc                              | Gal $\beta$ -4GlcNAc                                             | -  | - |
| 87  | LacNAc-AO                           | Gal $\beta$ -4GlcNAc-AO                                          | -  | - |
| 88  | Gal $\alpha$ -4Gal $\beta$ -4GlcNAc | Gal $\alpha$ -4Gal $\beta$ -4GlcNAc                              | -  | 2 |
| 89  | SU(3')-LN                           | SU-3Gal $\beta$ -4GlcNAc                                         | -  | - |
| 90  | Lea-Tri                             | Gal $\beta$ -3GlcNAc<br> <br>Fuc $\alpha$ -4                     | -  | - |
| 91  | Lea-Tri-AO                          | Gal $\beta$ -3GlcNAc-AO<br> <br>Fuc $\alpha$ -4                  | -  | - |
| 92  | Lex-Tri                             | Gal $\beta$ -4GlcNAc<br> <br>Fuc $\alpha$ -3                     | -  | - |
| 93  | Lex-Tri-AO                          | Gal $\beta$ -4GlcNAc-AO<br> <br>Fuc $\alpha$ -3                  | -  | - |
| 94  | Lex-Tri-(Me)AO                      | Gal $\beta$ -4GlcNAc-(Me)AO<br> <br>Fuc $\alpha$ -3              | -  | - |
| 95  | SU(3')-Lea-Tri                      | SU-3Gal $\beta$ -3GlcNAc<br> <br>Fuc $\alpha$ -4                 | -  | - |
| 96  | SU(3')-Lex-Tri                      | SU-3Gal $\beta$ -4GlcNAc<br> <br>Fuc $\alpha$ -3                 | -  | - |
| 97  | NeuAc $\alpha$ -(3')LN1-3           | NeuAc $\alpha$ -3Gal $\beta$ -3GlcNAc                            | -  | - |
| 98  | NeuAc $\alpha$ -(3')LN1-3-AO        | NeuAc $\alpha$ -3Gal $\beta$ -3GlcNAc-AO                         | -  | - |
| 99  | NeuAc $\alpha$ -(3')LN              | NeuAc $\alpha$ -3Gal $\beta$ -4GlcNAc                            | -  | - |
| 100 | NeuAc $\alpha$ -(3')LN-AO           | NeuAc $\alpha$ -3Gal $\beta$ -4GlcNAc-AO                         | 17 | - |
| 101 | PI-1                                | NeuAc $\alpha$ -3 (6-NAc) Gal $\beta$ -4GlcNAc                   | 23 | - |
| 102 | PI-1-AO                             | NeuAc $\alpha$ -3 (6-NAc) Gal $\beta$ -4GlcNAc-AO                | -  | - |
| 103 | PI-2                                | NeuAc $\alpha$ -3 (6-NBz) Gal $\beta$ -4GlcNAc                   | -  | - |
| 104 | PI-2-AO                             | NeuAc $\alpha$ -3 (6-NBz) Gal $\beta$ -4GlcNAc-AO                | -  | - |
| 105 | NeuAc $\alpha$ -(6')LN              | NeuAc $\alpha$ -6Gal $\beta$ -4GlcNAc                            | -  | - |
| 106 | NeuAc $\alpha$ -(6')LN-AO           | NeuAc $\alpha$ -6Gal $\beta$ -4GlcNAc-AO                         | 26 | - |
| 107 | Neu5,9Ac-(6')LN                     | Neu5,9Ac $\alpha$ -6Gal $\beta$ -4GlcNAc                         | -  | - |
| 108 | SA(3')-Lea-Tri                      | NeuAc $\alpha$ -3Gal $\beta$ -3GlcNAc<br> <br>Fuc $\alpha$ -4    | -  | - |
| 109 | SA(3')-Lea-Tri-AO                   | NeuAc $\alpha$ -3Gal $\beta$ -3GlcNAc-AO<br> <br>Fuc $\alpha$ -4 | -  | - |

|                                                       |                   |                                                                                             |   |   |
|-------------------------------------------------------|-------------------|---------------------------------------------------------------------------------------------|---|---|
| 110                                                   | SA(3')-Lex-Tri    | NeuAc $\alpha$ -3Gal $\beta$ -4GlcNAc<br> <br>Fuca-3                                        | - | - |
| 111                                                   | SA(3')-Lex-Tri-AO | NeuAc $\alpha$ -3Gal $\beta$ -4GlcNAc-AO<br> <br>Fuca-3                                     | - | - |
| 112                                                   | GSC-440           | NeuAc $\alpha$ -3Gal $\beta$ -4GlcNAc $\beta$ -C30<br> <br>Fuca-3                           | - | - |
| 113                                                   | GSC-512           | Neu4,5Ac $\alpha$ -3Gal $\beta$ -4GlcNAc $\beta$ -C30<br> <br>Fuca-3                        | - | - |
| 114                                                   | GSC-513           | Neu5,9Ac $\alpha$ -3Gal $\beta$ -3GlcNAc $\beta$ -C30<br> <br>Fuca-4                        | - | - |
| 115                                                   | GSC-511           | Neu5,9Ac $\alpha$ -3Gal $\beta$ -4GlcNAc $\beta$ -C30<br> <br>Fuca-3                        | - | - |
| <b>Lacto-N-neotetraose and Lacto-N-tetraose-based</b> |                   |                                                                                             |   |   |
| 116                                                   | GSC-225           | (3-carboxymethyl) Gal $\beta$ -4GlcNAc $\beta$ -3Gal $\beta$ -Cer36<br> <br>Fuca-3          | - | - |
| 117                                                   | GSC-236           | SU3<br> <br>Gal $\beta$ -4GlcNAc $\beta$ -3Gal $\beta$ -C30<br> <br>Fuca-3                  | - | - |
| 118                                                   | GSC-479           | NeuAc $\alpha$ -3Gal $\beta$ -4GlcNAc $\beta$ -3Gal $\beta$ -C30<br> <br>Fuca-3             | - | - |
| 119                                                   | GSC-105           | NeuAc $\alpha$ -3Gal $\beta$ -4GlcNAc $\beta$ -3Gal $\beta$ -Cer36<br> <br>Fuca-3           | - | - |
| 120                                                   | GSC-121           | NeuAc $\alpha$ -3Gal $\beta$ -4GlcNAc $\beta$ -3Gal $\beta$ -Cer36<br> <br>(3-deoxy) Fuca-3 | - | - |
| 121                                                   | GSC-123           | NeuAc $\alpha$ -3Gal $\beta$ -4GlcNAc $\beta$ -3Gal $\beta$ -Cer36<br> <br>(4-deoxy) Fuca-3 | - | - |
| 122                                                   | GSC-133           | NeuAc $\alpha$ -3Gal $\beta$ -4GlcNAc $\beta$ -3Gal $\beta$ -Cer36<br> <br>(2-OMe) Fuca-3   | - | - |
| 123                                                   | GSC-131           | NeuAc $\alpha$ -3Gal $\beta$ -4GlcNAc $\beta$ -3Gal $\beta$ -Cer36<br> <br>Quva-3           | - | - |

|     |                          |                                                                                                       |    |       |
|-----|--------------------------|-------------------------------------------------------------------------------------------------------|----|-------|
| 124 | GSC-163                  | NeuAc $\alpha$ -3Gal $\beta$ -4GlcNAc $\beta$ -3Gal $\beta$ -Cer36<br> <br>Rha $\alpha$ -3            | 3  | -     |
| 125 | GSC-127                  | NeuAc $\alpha$ -3Gal $\beta$ -4GlcNAc $\beta$ -3Gal $\beta$ -Cer36<br> <br>(6-deoxy)L-Tal $\alpha$ -3 | -  | -     |
| 126 | GSC-341                  | KDN $\alpha$ -3Gal $\beta$ -4GlcNAc $\beta$ -3Gal $\beta$ -C30<br> <br>Fuc $\alpha$ -3                | -  | -     |
| 127 | GSC-177                  | NeuGc $\alpha$ -3Gal $\beta$ -4GlcNAc $\beta$ -3Gal $\beta$ -Cer36<br> <br>Fuc $\alpha$ -3            | -  | -     |
| 128 | GSC-175                  | NeuAc $\alpha$ -3(4-deoxy)Gal $\beta$ -4GlcNAc $\beta$ -3Gal $\beta$ -Cer36<br> <br>Fuc $\alpha$ -3   | -  | -     |
| 129 | GSC-176                  | NeuAc $\alpha$ -3(6-deoxy)Gal $\beta$ -4GlcNAc $\beta$ -3Gal $\beta$ -Cer36<br> <br>Fuc $\alpha$ -3   | -  | -     |
| 130 | GSC-257                  | NeuAc $\alpha$ -3(4,6-deoxy)Gal $\beta$ -4GlcNAc $\beta$ -3Gal $\beta$ -Cer36<br> <br>Fuc $\alpha$ -3 | -  | -     |
| 131 | DLNN                     | GlcNAc $\beta$ -3Gal $\beta$ -4Glc                                                                    | -  | -     |
| 132 | LNT                      | Gal $\beta$ -3GlcNAc $\beta$ -3Gal $\beta$ -4Glc                                                      | -  | -     |
| 133 | Paragloboside            | Gal $\beta$ -4GlcNAc $\beta$ -3Gal $\beta$ -4Glc $\beta$ -Cer                                         | -  | -     |
| 134 | LNnT                     | Gal $\beta$ -4GlcNAc $\beta$ -3Gal $\beta$ -4Glc                                                      | -  | -     |
| 135 | B-like pentaosylceramide | Gal $\alpha$ -3Gal $\beta$ -4GlcNAc $\beta$ -3Gal $\beta$ -4Glc $\beta$ -Cer                          | -  | -     |
| 136 | Klaus glycolipid         | Gal $\beta$ -3Gal $\beta$ -4GlcNAc $\beta$ -3Gal $\beta$ -4Glc $\beta$ -Cer                           | -  | -     |
| 137 | GSC-207                  | GlcA $\beta$ -3Gal $\beta$ -4GlcNAc $\beta$ -3Gal $\beta$ -4Glc $\beta$ -C30                          | -  | -     |
| 138 | GSC-191                  | GlcA $\beta$ -3Gal $\beta$ -4GlcNAc $\beta$ -3Gal $\beta$ -4Glc $\beta$ -Cer36                        | -  | -     |
| 139 | GSC-189                  | GlcA $\beta$ -3Gal $\beta$ -4GlcNAc $\beta$ -3Gal $\beta$ -4Glc $\beta$ -Cer42                        | -  | -     |
| 140 | SU(3')-Tri               | SU-3Gal $\beta$ -4GlcNAc $\beta$ -3Gal                                                                | -  | -     |
| 141 | GSC-208                  | SU-3GlcA $\beta$ -3Gal $\beta$ -4GlcNAc $\beta$ -3Gal $\beta$ -4Glc $\beta$ -C30                      | -  | -     |
| 142 | GSC-192                  | SU-3GlcA $\beta$ -3Gal $\beta$ -4GlcNAc $\beta$ -3Gal $\beta$ -4Glc $\beta$ -Cer36                    | -  | -     |
| 143 | GSC-190                  | SU-3GlcA $\beta$ -3Gal $\beta$ -4GlcNAc $\beta$ -3Gal $\beta$ -4Glc $\beta$ -Cer42                    | -  | -     |
| 144 | Led-II pentaosylceramide | Fuc $\alpha$ -2Gal $\beta$ -3GlcNAc $\beta$ -3Gal $\beta$ -4Glc $\beta$ -CerA                         | -  | -     |
| 145 | Led-I pentaosylceramide  | Fuc $\alpha$ -2Gal $\beta$ -3GlcNAc $\beta$ -3Gal $\beta$ -4Glc $\beta$ -CerB                         | 11 | -     |
| 146 | LNFP-I                   | Fuc $\alpha$ -2Gal $\beta$ -3GlcNAc $\beta$ -3Gal $\beta$ -4Glc                                       | -  | -     |
| 147 | B-hexaosylceramide       | Gal $\alpha$ -3Gal $\beta$ -4GlcNAc $\beta$ -3Gal $\beta$ -4Glc $\beta$ -Cer<br> <br>Fuc $\alpha$ -2  | -  | 2,996 |

|     |                      |                                                                                                                    |   |    |
|-----|----------------------|--------------------------------------------------------------------------------------------------------------------|---|----|
| 148 | A-Hexa               | GalNAc $\alpha$ -3Gal $\beta$ -3GlcNAc $\beta$ -3Gal $\beta$ -4Glc<br> <br>Fuca-2                                  | - | -  |
| 149 | A-Hepta              | GalNAc $\alpha$ -3Gal $\beta$ -3GlcNAc $\beta$ -3Gal $\beta$ -4Glc<br>       <br>Fuca-2 Fuca-4                     | - | -  |
| 150 | LNFP-II              | Gal $\beta$ -3GlcNAc $\beta$ -3Gal $\beta$ -4Glc<br> <br>Fuca-4                                                    | - | -  |
| 151 | LNDFH-II             | Gal $\beta$ -3GlcNAc $\beta$ -3Gal $\beta$ -4Glc<br>                       <br>Fuca-4                 Fuca-3       | - | -  |
| 152 | Leb-hexaosylceramide | Fuca-2Gal $\beta$ -3GlcNAc $\beta$ -3Gal $\beta$ -4Glc $\beta$ -Cer<br> <br>Fuca-4                                 | - | -  |
| 153 | LNDFH-I              | Fuca-2Gal $\beta$ -3GlcNAc $\beta$ -3Gal $\beta$ -4Glc<br> <br>Fuca-4                                              | - | -  |
| 154 | LNTFH-I              | Fuca-2Gal $\beta$ -3GlcNAc $\beta$ -3Gal $\beta$ -4Glc<br>                       <br>Fuca-4                 Fuca-2 | - | -  |
| 155 | LNFP-III             | Gal $\beta$ -4GlcNAc $\beta$ -3Gal $\beta$ -4Glc<br> <br>Fuca-3                                                    | - | -  |
| 156 | LNFP-III-AO          | Gal $\beta$ -4GlcNAc $\beta$ -3Gal $\beta$ -4Glc-AO<br> <br>Fuca-3                                                 | - | -  |
| 157 | LNnDFH-I             | Fuca-2Gal $\beta$ -4GlcNAc $\beta$ -3Gal $\beta$ -4Glc<br> <br>Fuca-3                                              | - | -  |
| 158 | LNnDFH-II            | Gal $\beta$ -4GlcNAc $\beta$ -3Gal $\beta$ -4Glc<br>                       <br>Fuca-3                 Fuca-3       | - | -  |
| 159 | LNnDFH-V             | Gal $\beta$ -4GlcNAc $\beta$ -3Gal $\beta$ -4Glc<br>                       <br>Fuca-3                 Fuca-2       | - | 4  |
| 160 | LNnTFH-I             | Fuca-2Gal $\beta$ -4GlcNAc $\beta$ -3Gal $\beta$ -4Glc<br>                       <br>Fuca-3                 Fuca-2 | - | -  |
| 161 | SU(3')-LNFP-II       | SU-3Gal $\beta$ -3GlcNAc $\beta$ -4Gal $\beta$ -4Glc<br> <br>Fuca-4                                                | - | 29 |
| 162 | SU(6')-LNFP-II       | SU-6Gal $\beta$ -3GlcNAc $\beta$ -3Gal $\beta$ -4Glc<br> <br>Fuca-4                                                | - | -  |



|     |                     |                                                                                                 |    |    |
|-----|---------------------|-------------------------------------------------------------------------------------------------|----|----|
| 163 | SU(3')-LNFP-III     | SU-3Gal $\beta$ -4GlcNAc $\beta$ -3Gal $\beta$ -4Glc<br> <br>Fuca-3                             | 20 | -  |
| 164 | SU(6')-LNFP-III     | SU-6Gal $\beta$ -4GlcNAc $\beta$ -3Gal $\beta$ -4Glc<br> <br>Fuca-3                             | -  | -  |
| 165 | SU(3',6)-LNFP-III   | SU-6<br> <br>SU-3Gal $\beta$ -4GlcNAc $\beta$ -3Gal $\beta$ -4Glc<br> <br>Fuca-3                | -  | -  |
| 166 | LSTa                | NeuAc $\alpha$ -3Gal $\beta$ -3GlcNAc $\beta$ -3Gal $\beta$ -4Glc                               | -  | -  |
| 167 | GSC-272             | NeuAc $\alpha$ -3Gal $\beta$ -3GlcNAc $\beta$ -3Gal $\beta$ -4Glc $\beta$ -C30                  | -  | -  |
| 168 | GSC-147             | KDN $\alpha$ -3Gal $\beta$ -3GlcNAc $\beta$ -3Gal $\beta$ -4Glc $\beta$ -Cer36                  | -  | -  |
| 169 | GSC-396             | NeuGc $\alpha$ -3Gal $\beta$ -3GlcNAc $\beta$ -3Gal $\beta$ -4Glc $\beta$ -C30                  | -  | -  |
| 170 | LSTb                | Gal $\beta$ -3GlcNAc $\beta$ -3Gal $\beta$ -4Glc<br> <br>NeuAc $\alpha$ -6                      | -  | 19 |
| 171 | GSC-397             | NeuGc $\alpha$ -6Gal $\beta$ -3GlcNAc $\beta$ -3Gal $\beta$ -4Glc $\beta$ -C30                  | -  | -  |
| 172 | DSLNT               | NeuAc $\alpha$ -3Gal $\beta$ -3GlcNAc $\beta$ -3Gal $\beta$ -4Glc<br> <br>NeuAc $\alpha$ -6     | 4  | -  |
| 173 | Sialylparagloboside | NeuAc $\alpha$ -3Gal $\beta$ -4GlcNAc $\beta$ -3Gal $\beta$ -4Glc $\beta$ -Cer                  | -  | -  |
| 174 | GSC-273             | NeuAc $\alpha$ -3Gal $\beta$ -4GlcNAc $\beta$ -3Gal $\beta$ -4Glc $\beta$ -C30                  | -  | -  |
| 175 | GSC-31              | NeuAc $\alpha$ -3Gal $\beta$ -4GlcNAc $\beta$ -3Gal $\beta$ -4Glc $\beta$ -Cer36                | 10 | -  |
| 176 | LSTc                | NeuAc $\alpha$ -6Gal $\beta$ 4-GlcNAc $\beta$ 3-Gal $\beta$ 4-Glc                               | -  | -  |
| 177 | GSC-516B            | Neu $\alpha$ -3Gal $\beta$ -4GlcNAc $\beta$ -3Gal $\beta$ -4Glc $\beta$ -Cer36<br> <br>SU-6     | -  | -  |
| 178 | SA(3/6)LNFP-I       | NeuAc $\alpha$ -3/6Gal $\beta$ -3GlcNAc $\beta$ -3Gal $\beta$ -4Glc<br> <br>Fuca-2              | -  | -  |
| 179 | SA(3')-LNFP-II      | NeuAc $\alpha$ -3Gal $\beta$ -3GlcNAc $\beta$ -3Gal $\beta$ -4Glc<br> <br>Fuca-4                | -  | -  |
| 180 | SA(6')-LNFP-VI      | NeuAc $\alpha$ -6Gal $\beta$ -4GlcNAc $\beta$ -3Gal $\beta$ -4Glc<br> <br>Fuca-3                | -  | -  |
| 181 | GSC-533             | NeuAc $\alpha$ -3Gal $\beta$ -4GlcN $\beta$ -3Gal $\beta$ -4Glc $\beta$ -Cer36<br> <br>Fuca-3   | -  | -  |
| 182 | GSC-64              | NeuAc $\alpha$ -3Gal $\beta$ -4GlcNAc $\beta$ -3Gal $\beta$ -4Glc $\beta$ -Cer36<br> <br>Fuca-3 | -  | -  |

|                                               |                 |                                                                                                                               |   |   |
|-----------------------------------------------|-----------------|-------------------------------------------------------------------------------------------------------------------------------|---|---|
| 183                                           | SA(3')-LNFP-III | NeuAc $\alpha$ -3Gal $\beta$ -4GlcNAc $\beta$ -3Gal $\beta$ -4Glc<br> <br>Fuca-3                                              | - | - |
| 184                                           | GSC-472         | Neu $\alpha$ -3Gal $\beta$ -4GlcNAc $\beta$ -3Gal $\beta$ -4Glc $\beta$ -Cer36<br> <br>Fuca-3                                 | - | - |
| 185                                           | GSC-97          | NeuAc $\alpha$ -6Gal $\beta$ -4GlcNAc $\beta$ -3Gal $\beta$ -4Glc $\beta$ -Cer36<br> <br>Fuca-3                               | - | - |
| 186                                           | GSC-314         | KDN $\alpha$ -3Gal $\beta$ -4GlcNAc $\beta$ -3Gal $\beta$ -4Glc $\beta$ -C30<br> <br>Fuca-3                                   | - | - |
| 187                                           | GSC-149         | KDN $\alpha$ -3Gal $\beta$ -4GlcNAc $\beta$ -3Gal $\beta$ -4Glc $\beta$ -Cer36<br> <br>Fuca-3                                 | - | - |
| 188                                           | GSC-311         | KDN $\alpha$ -3Gal $\beta$ -4GlcNAc $\beta$ -3Gal $\beta$ -4Glc $\beta$ -C30<br> <br>Rha $\alpha$ -3                          | - | - |
| 189                                           | GSC-268         | SU-6<br> <br>NeuAc $\alpha$ -3Gal $\beta$ -4GlcNAc $\beta$ -3Gal $\beta$ -4Glc $\beta$ -Cer36<br> <br>Fuca-3                  | - | - |
| 190                                           | GSC-268 deNAc   | SU-6<br> <br>Neu $\alpha$ -3Gal $\beta$ -4GlcN $\beta$ -3Gal $\beta$ -4Glc $\beta$ -Cer36<br> <br>Fuca-3                      | - | - |
| 191                                           | GSC-269         | SU-6<br> <br>NeuAc $\alpha$ -3Gal $\beta$ -4GlcNAc $\beta$ -3Gal $\beta$ -4Glc $\beta$ -Cer36<br> <br>Fuca-3                  | - | - |
| 192                                           | GSC-406         | SU-6<br> <br>Neu $\alpha$ -3Gal $\beta$ -4GlcNAc $\beta$ -3Gal $\beta$ -4Glc $\beta$ -Cer36<br> <br>Fuca-3                    | - | - |
| 193                                           | GSC-270         | SU-6    SU-6<br>          <br>NeuAc $\alpha$ -3Gal $\beta$ -4GlcNAc $\beta$ -3Gal $\beta$ -4Glc $\beta$ -Cer36<br> <br>Fuca-3 | - | - |
| <b><i>Polylactosamine li-antigen type</i></b> |                 |                                                                                                                               |   |   |
| 194                                           | pLNH            | Gal $\beta$ -3GlcNAc $\beta$ -3Gal $\beta$ -4GlcNAc $\beta$ -3Gal $\beta$ -4Glc                                               | - | - |
| 195                                           | pLNnH           | Gal $\beta$ -4GlcNAc $\beta$ -3Gal $\beta$ -4GlcNAc $\beta$ -3Gal $\beta$ -4Glc                                               | - | - |
| 196                                           | GSC-216         | GlcA $\beta$ -3Gal $\beta$ -4GlcNAc $\beta$ -3Gal $\beta$ -4GlcNAc $\beta$ -3Gal $\beta$ -4Glc $\beta$ -Cer42                 | - | - |

|     |                      |                                                                                                                                                                                                                          |    |   |
|-----|----------------------|--------------------------------------------------------------------------------------------------------------------------------------------------------------------------------------------------------------------------|----|---|
| 197 | GSC-217              | SU-3GlcA $\beta$ -3Gal $\beta$ -4GlcNAc $\beta$ -3Gal $\beta$ -4GlcNAc $\beta$ -3Gal $\beta$ -4Glc $\beta$ -Cer42                                                                                                        | -  | - |
| 198 | GSC-218              | GlcA $\beta$ -3Gal $\beta$ -4GlcNAc $\beta$ -3Gal $\beta$ -4GlcNAc $\beta$ -3Gal $\beta$ -4Glc $\beta$ -Cer36                                                                                                            | 34 | - |
| 199 | GSC-219              | SU-3GlcA $\beta$ -3Gal $\beta$ -4GlcNAc $\beta$ -3Gal $\beta$ -4GlcNAc $\beta$ -3Gal $\beta$ -4Glc $\beta$ -Cer36                                                                                                        | -  | - |
| 200 | LNH                  | Gal $\beta$ -4GlcNAc $\beta$ -6<br> <br>Gal $\beta$ -4Glc<br> <br>Gal $\beta$ -3GlcNAc $\beta$ -3                                                                                                                        | -  | - |
| 201 | iLNO                 | Gal $\beta$ -3GlcNAc $\beta$ -3Gal $\beta$ -4GlcNAc $\beta$ -6<br> <br>Gal $\beta$ -4Glc<br> <br>Gal $\beta$ -3GlcNAc $\beta$ -3                                                                                         | -  | - |
| 202 | LND                  | Gal $\beta$ -4GlcNAc $\beta$ -6<br> <br>Gal $\beta$ -4GlcNAc $\beta$ -6<br> <br>Gal $\beta$ -3GlcNAc $\beta$ -3<br>Gal $\beta$ -4Glc<br> <br>Gal $\beta$ -3GlcNAc $\beta$ -3                                             | 20 | - |
| 203 | LNnH                 | Gal $\beta$ -4GlcNAc $\beta$ -6<br> <br>Gal $\beta$ -4Glc<br> <br>Gal $\beta$ -4GlcNAc $\beta$ -3                                                                                                                        | -  | - |
| 204 | Nonaosylceramide     | GlcNAc $\beta$ -6<br> <br>GlcNAc $\beta$ -6<br> <br>Gal $\beta$ -4GlcNAc $\beta$ -3<br> <br>GlcNAc $\beta$ -3<br>Gal $\beta$ -4GlcNAc $\beta$ -3Gal $\beta$ -4Glc $\beta$ -Cer                                           | -  | - |
| 205 | I-octaosylceramide   | Gal $\beta$ -4GlcNAc $\beta$ -6<br> <br>Gal $\beta$ -4GlcNAc $\beta$ -3Gal $\beta$ -4Glc $\beta$ -Cer<br> <br>Gal $\beta$ -4GlcNAc $\beta$ -3                                                                            | -  | - |
| 206 | I-dodecaosylceramide | Gal $\beta$ -4GlcNAc $\beta$ -6<br> <br>Gal $\beta$ -4GlcNAc $\beta$ -6<br> <br>Gal $\beta$ -4GlcNAc $\beta$ -3<br> <br>Gal $\beta$ -4GlcNAc $\beta$ -3<br>Gal $\beta$ -4GlcNAc $\beta$ -3Gal $\beta$ -4Glc $\beta$ -Cer | 38 | - |

|     |                              |                                                                                                                                                                                                                                                                                                                                                                                                             |    |    |
|-----|------------------------------|-------------------------------------------------------------------------------------------------------------------------------------------------------------------------------------------------------------------------------------------------------------------------------------------------------------------------------------------------------------------------------------------------------------|----|----|
| 207 | I-hexadecaosylceramide       | $  \begin{array}{c}  \text{Gal}\beta\text{-4GlcNAc}\beta\text{-6} \\    \\  \text{Gal}\beta\text{-4GlcNAc}\beta\text{-6} \quad \text{Gal}\beta\text{-4GlcNAc}\beta\text{-3} \\    \quad   \\  \text{Gal}\beta\text{-4GlcNAc}\beta\text{-6} \quad \text{Gal}\beta\text{-4GlcNAc}\beta\text{-3} \\    \\  \text{Gal}\beta\text{-4GlcNAc}\beta\text{-3}  \end{array}  $                                        | 44 | 23 |
| 208 | I-eicosaosylceramide         | $  \begin{array}{c}  \text{Gal}\beta\text{-4GlcNAc}\beta\text{-6} \\    \\  \text{Gal}\beta\text{-4GlcNAc}\beta\text{-6} \quad \text{Gal}\beta\text{-4GlcNAc}\beta\text{-3} \\    \quad   \\  \text{Gal}\beta\text{-4GlcNAc}\beta\text{-6} \quad \text{Gal}\beta\text{-4GlcNAc}\beta\text{-3} \\    \\  \text{Gal}\beta\text{-4GlcNAc}\beta\text{-3}  \end{array}  $                                        | 47 | -  |
| 209 | B-like decaosylceramide      | $  \begin{array}{c}  \text{Gal}\alpha\text{-3Gal}\beta\text{-4GlcNAc}\beta\text{-6} \\    \\  \text{Gal}\beta\text{-4GlcNAc}\beta\text{-3Gal}\beta\text{-4Glc}\beta\text{-Cer} \\    \\  \text{Gal}\alpha\text{-3Gal}\beta\text{-4GlcNAc}\beta\text{-3}  \end{array}  $                                                                                                                                     | -  | -  |
| 210 | B-like pentadecaosylceramide | $  \begin{array}{c}  \text{Gal}\alpha\text{-3Gal}\beta\text{-4GlcNAc}\beta\text{-6} \\    \\  \text{Gal}\alpha\text{-3Gal}\beta\text{-4GlcNAc}\beta\text{-6} \quad \text{Gal}\beta\text{-4GlcNAc}\beta\text{-3Gal}\beta\text{-4Glc}\beta\text{-Cer} \\    \quad   \\  \text{Gal}\beta\text{-4GlcNAc}\beta\text{-3} \\    \\  \text{Gal}\alpha\text{-3Gal}\beta\text{-4GlcNAc}\beta\text{-3}  \end{array}  $ | -  | -  |
| 211 | B-like eicosaosylceramide    | $  \begin{array}{c}  \text{Gal}\alpha\text{-3Gal}\beta\text{-4GlcNAc}\beta\text{-6} \\    \\  \text{Gal}\alpha\text{-3Gal}\beta\text{-4GlcNAc}\beta\text{-6} \quad \text{Gal}\beta\text{-4GlcNAc}\beta\text{-3Gal}\beta\text{-4Glc}\beta\text{-Cer} \\    \quad   \\  \text{Gal}\beta\text{-4GlcNAc}\beta\text{-3} \\    \\  \text{Gal}\alpha\text{-3Gal}\beta\text{-4GlcNAc}\beta\text{-3}  \end{array}  $ | -  | -  |

|     |                               |                                                                                                                                                                                                                                                                                                                                                                                                                                                                                                                                           |     |   |
|-----|-------------------------------|-------------------------------------------------------------------------------------------------------------------------------------------------------------------------------------------------------------------------------------------------------------------------------------------------------------------------------------------------------------------------------------------------------------------------------------------------------------------------------------------------------------------------------------------|-----|---|
| 212 | B-like pentaicosaosylceramide | $  \begin{array}{c}  \text{Gal}\alpha\text{-3Gal}\beta\text{-4GlcNAc}\beta\text{-6} \\    \\  \text{Gal}\alpha\text{-3Gal}\beta\text{-4GlcNAc}\beta\text{-6} \quad \text{Gal}\beta\text{-4GlcNAc}\beta\text{-3} \\    \qquad \qquad \qquad   \\  \text{Gal}\alpha\text{-3Gal}\beta\text{-4GlcNAc}\beta\text{-6} \quad \text{Gal}\beta\text{-4GlcNAc}\beta\text{-6} \\    \qquad \qquad \qquad   \\  \text{Gal}\beta\text{-4GlcNAc}\beta\text{-3} \\    \\  \text{Gal}\alpha\text{-3Gal}\beta\text{-4GlcNAc}\beta\text{-3}  \end{array}  $ | 153 | - |
| 213 | pLNFH-IV                      | $  \begin{array}{c}  \text{Gal}\beta\text{-3GlcNAc}\beta\text{-3Gal}\beta\text{-4GlcNAc}\beta\text{-3Gal}\beta\text{-4Glc} \\    \\  \text{Fuc}\alpha\text{-3}  \end{array}  $                                                                                                                                                                                                                                                                                                                                                            | 9   | - |
| 214 | DFpLNH-II                     | $  \begin{array}{c}  \text{Gal}\beta\text{-3GlcNAc}\beta\text{-3Gal}\beta\text{-4GlcNAc}\beta\text{-3Gal}\beta\text{-4Glc} \\    \qquad \qquad \qquad   \\  \text{Fuc}\alpha\text{-4} \qquad \qquad \text{Fuc}\alpha\text{-3}  \end{array}  $                                                                                                                                                                                                                                                                                             | -   | - |
| 215 | TFpLNH-I                      | $  \begin{array}{c}  \text{Fuc}\alpha\text{-2Gal}\beta\text{-3GlcNAc}\beta\text{-3Gal}\beta\text{-4GlcNAc}\beta\text{-3Gal}\beta\text{-4Glc} \\    \qquad \qquad \qquad   \\  \text{Fuc}\alpha\text{-4} \qquad \qquad \text{Fuc}\alpha\text{-3}  \end{array}  $                                                                                                                                                                                                                                                                           | -   | - |
| 216 | MFLNH-III                     | $  \begin{array}{c}  \text{Gal}\beta\text{-4GlcNAc}\beta\text{-6} \\    \qquad \qquad \qquad   \\  \text{Fuc}\alpha\text{-3} \qquad \qquad \text{Gal}\beta\text{-4Glc} \\    \\  \text{Gal}\beta\text{-3GlcNAc}\beta\text{-3}  \end{array}  $                                                                                                                                                                                                                                                                                             | -   | - |
| 217 | DFLNH(b)                      | $  \begin{array}{c}  \text{Fuc}\alpha\text{-3} \\    \\  \text{Gal}\beta\text{-4GlcNAc}\beta\text{-6} \\    \\  \text{Gal}\beta\text{-4Glc} \\    \\  \text{Gal}\beta\text{-3GlcNAc}\beta\text{-3} \\    \\  \text{Fuc}\alpha\text{-4}  \end{array}  $                                                                                                                                                                                                                                                                                    | -   | - |
| 218 | DFLNH(c)                      | $  \begin{array}{c}  \text{Gal}\beta\text{-4GlcNAc}\beta\text{-6} \\    \\  \text{Gal}\beta\text{-4Glc} \\    \\  \text{Fuc}\alpha\text{-2Gal}\beta\text{-3GlcNAc}\beta\text{-3} \\    \\  \text{Fuc}\alpha\text{-4}  \end{array}  $                                                                                                                                                                                                                                                                                                      | -   | - |
| 219 | DFLNH(a)                      | $  \begin{array}{c}  \text{Gal}\beta\text{-4GlcNAc}\beta\text{-6} \\    \qquad \qquad \qquad   \\  \text{Fuc}\alpha\text{-3} \qquad \qquad \text{Gal}\beta\text{-4Glc} \\    \\  \text{Fuc}\alpha\text{-2Gal}\beta\text{-3GlcNAc}\beta\text{-3}  \end{array}  $                                                                                                                                                                                                                                                                           | -   | - |

|     |                          |                                                                                                                                                                                                                                                                                                                                                               |        |        |
|-----|--------------------------|---------------------------------------------------------------------------------------------------------------------------------------------------------------------------------------------------------------------------------------------------------------------------------------------------------------------------------------------------------------|--------|--------|
| 220 | TFLNH                    | $  \begin{array}{c}  \text{Gal}\beta\text{-4GlcNAc}\beta\text{-6} \\    \\  \text{Fuca}\alpha\text{-3} \quad \text{Gal}\beta\text{-4Glc} \\    \quad   \\  \text{Fuca}\alpha\text{-2Gal}\beta\text{-3GlcNAc}\beta\text{-3} \\    \\  \text{Fuca}\alpha\text{-4}  \end{array}  $                                                                               | -      | -      |
| 221 | MFILNO-IV                | $  \begin{array}{c}  \text{Gal}\beta\text{-3GlcNAc}\beta\text{-3Gal}\beta\text{-4GlcNAc}\beta\text{-6} \\    \quad   \\  \text{Fuca}\alpha\text{-3} \quad \text{Gal}\beta\text{-4Glc} \\    \\  \text{Gal}\beta\text{-3GlcNAc}\beta\text{-3}  \end{array}  $                                                                                                  | -      | -      |
| 222 | TFILNO                   | $  \begin{array}{c}  \text{Gal}\beta\text{-3GlcNAc}\beta\text{-3Gal}\beta\text{-4GlcNAc}\beta\text{-6} \\    \quad   \quad   \\  \text{Fuca}\alpha\text{-4} \quad \text{Fuca}\alpha\text{-3} \quad \text{Gal}\beta\text{-4Glc} \\    \quad   \\  \text{Gal}\beta\text{-3GlcNAc}\beta\text{-3} \\    \\  \text{Fuca}\alpha\text{-4}  \end{array}  $            | -      | -      |
| 223 | MFLND                    | $  \begin{array}{c}  \text{Gal}\beta\text{-4GlcNAc}\beta\text{-6} \\    \\  \text{Fuca}\alpha\text{-3} \quad \text{Gal}\beta\text{-4GlcNAc}\beta\text{-6} \\    \quad   \\  \text{Gal}\beta\text{-3GlcNAc}\beta\text{-3} \quad \text{Gal}\beta\text{-4Glc} \\    \\  \text{Gal}\beta\text{-3GlcNAc}\beta\text{-3}  \end{array}  $                             | -      | -      |
| 224 | MFLNnH(a)                | $  \begin{array}{c}  \text{Gal}\beta\text{-4GlcNAc}\beta\text{-6} \\    \\  \text{Fuca}\alpha\text{-3} \quad \text{Gal}\beta\text{-4Glc} \\    \\  \text{Gal}\beta\text{-4GlcNAc}\beta\text{-3}  \end{array}  $                                                                                                                                               | -      | -      |
| 225 | DFLNnH                   | $  \begin{array}{c}  \text{Fuca}\alpha\text{-3} \\    \\  \text{Gal}\beta\text{-4GlcNAc}\beta\text{-6} \\    \\  \text{Gal}\beta\text{-4Glc} \\    \\  \text{Gal}\beta\text{-4GlcNAc}\beta\text{-3} \\    \\  \text{Fuca}\alpha\text{-3}  \end{array}  $                                                                                                      | -      | -      |
| 226 | B-III dodecaosylceramide | $  \begin{array}{c}  \text{Gal}\alpha\text{-3Gal}\beta\text{-4GlcNAc}\beta\text{-6} \\    \quad   \\  \text{Fuca}\alpha\text{-2} \quad \text{Gal}\beta\text{-4GlcNAc}\beta\text{-3Gal}\beta\text{-4Glc}\beta\text{-Cer} \\    \quad   \\  \text{Gal}\alpha\text{-3Gal}\beta\text{-4GlcNAc}\beta\text{-3} \\    \\  \text{Fuca}\alpha\text{-2}  \end{array}  $ | 26,739 | 25,500 |

|                                |                            |                                                                                                                                                                                                                                                                                                                                                                                                                             |        |        |
|--------------------------------|----------------------------|-----------------------------------------------------------------------------------------------------------------------------------------------------------------------------------------------------------------------------------------------------------------------------------------------------------------------------------------------------------------------------------------------------------------------------|--------|--------|
| 227                            | B-IV tetradecaosylceramide | $\begin{array}{c} \text{Gal}\alpha\text{-3Gal}\beta\text{-4GlcNAc}\beta\text{-6} \\   \\ \text{Fuca}\alpha\text{-2} \qquad \qquad \qquad   \\ \qquad \qquad \qquad \qquad \qquad \text{Gal}\beta\text{-4GlcNAc}\beta\text{-3Gal}\beta\text{-4Glc}\beta\text{-Cer} \\ \\ \text{Gal}\alpha\text{-3Gal}\beta\text{-4GlcNAc}\beta\text{-3Gal}\beta\text{-4GlcNAc}\beta\text{-3} \\   \\ \text{Fuca}\alpha\text{-2} \end{array}$ | 17,201 | 22,120 |
| 228                            | MSLNH                      | $\begin{array}{c} \text{NeuAc}\alpha\text{-6Gal}\beta\text{-4GlcNAc}\beta\text{-6} \\   \\ \text{Gal}\beta\text{-4Glc} \\   \\ \text{Gal}\beta\text{-3GlcNAc}\beta\text{-3} \end{array}$                                                                                                                                                                                                                                    | -      | -      |
| 229                            | MSLNnH-I                   | $\begin{array}{c} \text{Gal}\beta\text{-4GlcNAc}\beta\text{-6} \\   \\ \text{Gal}\beta\text{-4Glc} \\   \\ \text{NeuAc}\alpha\text{-6Gal}\beta\text{-3GlcNAc}\beta\text{-3} \end{array}$                                                                                                                                                                                                                                    | -      | -      |
| 230                            | DSLNNH                     | $\begin{array}{c} \text{NeuAc}\alpha\text{-6Gal}\beta\text{-4GlcNAc}\beta\text{-6} \\   \\ \text{Gal}\beta\text{-4Glc} \\   \\ \text{NeuAc}\alpha\text{-6Gal}\beta\text{-4GlcNAc}\beta\text{-3} \end{array}$                                                                                                                                                                                                                | -      | -      |
| 231                            | MSMFLNH                    | $\begin{array}{c} \text{Gal}\beta\text{-4GlcNAc}\beta\text{-6} \\   \\ \text{Fuca}\alpha\text{-3} \qquad \qquad \qquad   \\ \qquad \qquad \qquad \qquad \qquad \text{Gal}\beta\text{-4Glc} \\   \\ \text{NeuAc}\alpha\text{-3Gal}\beta\text{-3GlcNAc}\beta\text{-3} \end{array}$                                                                                                                                            | -      | -      |
| 232                            | MFMSLNnH                   | $\begin{array}{c} \text{Gal}\beta\text{-4GlcNAc}\beta\text{-6} \\   \\ \text{Fuca}\alpha\text{-3} \qquad \qquad \qquad   \\ \qquad \qquad \qquad \qquad \qquad \text{Gal}\beta\text{-4Glc} \\   \\ \text{NeuAc}\alpha\text{-6Gal}\beta\text{-3GlcNAc}\beta\text{-3} \end{array}$                                                                                                                                            | -      | -      |
| 233                            | GSC-221                    | $\begin{array}{c} \text{NeuAc}\alpha\text{-3Gal}\beta\text{-4GlcNAc}\beta\text{-3Gal}\beta\text{-4GlcNAc}\beta\text{-3Gal}\beta\text{-4Glc}\beta\text{-Cer36} \\   \\ \text{Fuca}\alpha\text{-3} \end{array}$                                                                                                                                                                                                               | -      | -      |
| 234                            | GSC-220                    | $\begin{array}{c} \text{NeuAc}\alpha\text{-3Gal}\beta\text{-4GlcNAc}\beta\text{-3Gal}\beta\text{-4GlcNAc}\beta\text{-3Gal}\beta\text{-4Glc}\beta\text{-Cer36} \\   \qquad \qquad \qquad   \\ \text{Fuca}\alpha\text{-3} \qquad \qquad \text{Fuca}\alpha\text{-3} \end{array}$                                                                                                                                               | -      | -      |
| 235                            | C4U                        | $\begin{array}{c} \text{NeuAc}\alpha\text{-3Gal}\beta\text{-4GlcNAc}\beta\text{-3Gal}\beta\text{-3GlcNAc} \\   \qquad \qquad   \qquad \qquad   \\ \text{SU-6} \qquad \text{SU-6} \qquad \text{SU-6} \end{array}$                                                                                                                                                                                                            | -      | -      |
| <b><i>N-glycan-related</i></b> |                            |                                                                                                                                                                                                                                                                                                                                                                                                                             |        |        |
| 236                            | Man2( $\alpha$ 2)          | Man $\alpha$ -2Man                                                                                                                                                                                                                                                                                                                                                                                                          | -      | -      |
| 237                            | Man2( $\alpha$ 3)          | Man $\alpha$ -3Man                                                                                                                                                                                                                                                                                                                                                                                                          | -      | -      |
| 238                            | Man2( $\alpha$ 6)          | Man $\alpha$ -6Man                                                                                                                                                                                                                                                                                                                                                                                                          | -      | -      |

|     |             |                                                                                                                                                                                                                                               |    |   |
|-----|-------------|-----------------------------------------------------------------------------------------------------------------------------------------------------------------------------------------------------------------------------------------------|----|---|
| 239 | Man3(α3,α6) | $\begin{array}{c} \text{Man}\alpha\text{-6Man} \\   \\ \text{Man}\alpha\text{-3} \end{array}$                                                                                                                                                 | 21 | - |
| 240 | Man5(α3,α6) | $\begin{array}{c} \text{Man}\alpha\text{-6Man}\alpha\text{-6Man} \\   \quad   \\ \text{Man}\alpha\text{-3} \quad \text{Man}\alpha\text{-3} \end{array}$                                                                                       | -  | - |
| 241 | Man1GN1     | Manβ-4GlcNAc                                                                                                                                                                                                                                  | -  | - |
| 242 | Man2GN1     | Manα-3Manβ-4GlcNAc                                                                                                                                                                                                                            | -  | - |
| 243 | Man2aGN2    | Manα-6Manβ-4GlcNAcβ-4GlcNAc                                                                                                                                                                                                                   | -  | - |
| 244 | Man3GN2     | $\begin{array}{c} \text{Man}\alpha\text{-6} \\   \\ \text{Man}\beta\text{-4GlcNAc}\beta\text{-4GlcNAc} \\   \\ \text{Man}\alpha\text{-3} \end{array}$                                                                                         | -  | - |
| 245 | Man4aGN2    | $\begin{array}{c} \text{Man}\alpha\text{-3Man}\alpha\text{-6} \\   \\ \text{Man}\beta\text{-4GlcNAc}\beta\text{-4GlcNAc} \\   \\ \text{Man}\alpha\text{-3} \end{array}$                                                                       | -  | - |
| 246 | Man4bGN2    | $\begin{array}{c} \text{Man}\alpha\text{-6} \\   \\ \text{Man}\alpha\text{-3Man}\alpha\text{-6} \\   \\ \text{Man}\beta\text{-4GlcNAc}\beta\text{-4GlcNAc} \end{array}$                                                                       | -  | - |
| 247 | Man5GN2     | $\begin{array}{c} \text{Man}\alpha\text{-6} \\   \\ \text{Man}\alpha\text{-3Man}\alpha\text{-6} \\   \\ \text{Man}\beta\text{-4GlcNAc}\beta\text{-4GlcNAc} \\   \\ \text{Man}\alpha\text{-3} \end{array}$                                     | -  | - |
| 248 | Man6GN2     | $\begin{array}{c} \text{Man}\alpha\text{-6} \\   \\ \text{Man}\alpha\text{-3Man}\alpha\text{-6} \\   \\ \text{Man}\beta\text{-4GlcNAc}\beta\text{-4GlcNAc} \\   \\ \text{Man}\alpha\text{-2Man}\alpha\text{-3} \end{array}$                   | -  | - |
| 249 | Man7(D1)GN2 | $\begin{array}{c} \text{Man}\alpha\text{-6} \\   \\ \text{Man}\alpha\text{-3Man}\alpha\text{-6} \\   \\ \text{Man}\beta\text{-4GlcNAc}\beta\text{-4GlcNAc} \\   \\ \text{Man}\alpha\text{-2Man}\alpha\text{-2Man}\alpha\text{-3} \end{array}$ | -  | - |



|     |                |                                                                                                                                                                                                                                                                                                                                          |   |   |
|-----|----------------|------------------------------------------------------------------------------------------------------------------------------------------------------------------------------------------------------------------------------------------------------------------------------------------------------------------------------------------|---|---|
| 250 | Man7(D1)GN2-AO | $  \begin{array}{c}  \text{Man}\alpha\text{-6} \\    \\  \text{Man}\alpha\text{-3Man}\alpha\text{-6} \\    \\  \text{Man}\beta\text{-4GlcNAc}\beta\text{-4GlcNAc-AO} \\    \\  \text{Man}\alpha\text{-2Man}\alpha\text{-2Man}\alpha\text{-3}  \end{array}  $                                                                             | - | - |
| 251 | Man7(D3)GN2    | $  \begin{array}{c}  \text{Man}\alpha\text{-2Man}\alpha\text{-6} \\    \\  \text{Man}\alpha\text{-3Man}\alpha\text{-6} \\    \\  \text{Man}\beta\text{-4GlcNAc}\beta\text{-4GlcNAc} \\    \\  \text{Man}\alpha\text{-2Man}\alpha\text{-3}  \end{array}  $                                                                                | - | - |
| 252 | Man8(D1D3)GN2  | $  \begin{array}{c}  \text{Man}\alpha\text{-2Man}\alpha\text{-6} \\    \\  \text{Man}\alpha\text{-3Man}\alpha\text{-6} \\    \\  \text{Man}\beta\text{-4GlcNAc}\beta\text{-4GlcNAc} \\    \\  \text{Man}\alpha\text{-2Man}\alpha\text{-2Man}\alpha\text{-3}  \end{array}  $                                                              | - | - |
| 253 | Man9GN2        | $  \begin{array}{c}  \text{Man}\alpha\text{-2Man}\alpha\text{-6} \\    \\  \text{Man}\alpha\text{-2Man}\alpha\text{-3Man}\alpha\text{-6} \\    \\  \text{Man}\beta\text{-4GlcNAc}\beta\text{-4GlcNAc} \\    \\  \text{Man}\alpha\text{-2Man}\alpha\text{-2Man}\alpha\text{-3}  \end{array}  $                                            | - | - |
| 254 | Man9GN2-AO     | $  \begin{array}{c}  \text{Man}\alpha\text{-2Man}\alpha\text{-6} \\    \\  \text{Man}\alpha\text{-2Man}\alpha\text{-3Man}\alpha\text{-6} \\    \\  \text{Man}\beta\text{-4GlcNAc}\beta\text{-4GlcNAc-AO} \\    \\  \text{Man}\alpha\text{-2Man}\alpha\text{-2Man}\alpha\text{-3}  \end{array}  $                                         | - | - |
| 255 | Glc1Man9GN2    | $  \begin{array}{c}  \text{Man}\alpha\text{-2Man}\alpha\text{-6} \\    \\  \text{Man}\alpha\text{-6} \\    \quad   \\  \text{Man}\alpha\text{-2Man}\alpha\text{-3} \quad \text{Man}\beta\text{-4GlcNAc}\beta\text{-4GlcNAc} \\    \\  \text{Glc}\alpha\text{-3Man}\alpha\text{-2Man}\alpha\text{-2Man}\alpha\text{-3}  \end{array}  $    | - | - |
| 256 | Glc1Man9GN2-AO | $  \begin{array}{c}  \text{Man}\alpha\text{-2Man}\alpha\text{-6} \\    \\  \text{Man}\alpha\text{-6} \\    \quad   \\  \text{Man}\alpha\text{-2Man}\alpha\text{-3} \quad \text{Man}\beta\text{-4GlcNAc}\beta\text{-4GlcNAc-AO} \\    \\  \text{Glc}\alpha\text{-3Man}\alpha\text{-2Man}\alpha\text{-2Man}\alpha\text{-3}  \end{array}  $ | - | - |

|     |                    |                                                                                                                                                                                                                                                                                                                                                           |   |   |
|-----|--------------------|-----------------------------------------------------------------------------------------------------------------------------------------------------------------------------------------------------------------------------------------------------------------------------------------------------------------------------------------------------------|---|---|
| 257 | Glc2Man9GN2-AO     | $  \begin{array}{c}  \text{Man}\alpha\text{-2Man}\alpha\text{-6} \\    \\  \text{Man}\alpha\text{-6} \\    \quad   \\  \text{Man}\alpha\text{-2Man}\alpha\text{-3} \quad \text{Man}\beta\text{-4GlcNAc}\beta\text{-4GlcNAc-AO} \\    \\  \text{Glc}\alpha\text{-Glc}\alpha\text{-3Man}\alpha\text{-2Man}\alpha\text{-2Man}\alpha\text{-3}  \end{array}  $ | - | - |
| 258 | Glc2Man7(D1)GN1-AO | $  \begin{array}{c}  \text{Man}\alpha\text{-6} \\    \\  \text{Man}\alpha\text{-3Man}\alpha\text{-6} \\    \\  \text{Man}\beta\text{-4GlcNAc-AO} \\    \\  \text{Glc}\alpha\text{-3Glc}\alpha\text{-3Man}\alpha\text{-2Man}\alpha\text{-2Man}\alpha\text{-3}  \end{array}  $                                                                              | - | - |
| 259 | Glc3Man7(D1)GN1-AO | $  \begin{array}{c}  \text{Man}\alpha\text{-6} \\    \\  \text{Man}\alpha\text{-3Man}\alpha\text{-6} \\    \\  \text{Man}\beta\text{-4GlcNAc-AO} \\    \\  \text{Glc}\alpha\text{-2Glc}\alpha\text{-3Glc}\alpha\text{-3Man}\alpha\text{-2Man}\alpha\text{-2Man}\alpha\text{-3}  \end{array}  $                                                            | - | - |
| 260 | Man3XylGN2         | $  \begin{array}{c}  \text{Man}\alpha\text{-6} \\    \\  \text{Xyl}\beta\text{-2Man}\beta\text{-4GlcNAc}\beta\text{-4GlcNAc} \\    \\  \text{Man}\alpha\text{-3}  \end{array}  $                                                                                                                                                                          | - | - |
| 261 | N1                 | $  \begin{array}{c}  \text{Gal}\beta\text{-4GlcNAc}\beta\text{-2Man}\alpha\text{-6} \quad \text{Fuc}\alpha\text{-6} \\    \quad   \\  \text{Man}\beta\text{-4GlcNAc}\beta\text{-4GlcNAc} \\    \\  \text{Man}\alpha\text{-3}  \end{array}  $                                                                                                              | - | - |
| 262 | N2                 | $  \begin{array}{c}  \text{Man}\alpha\text{-6} \\    \\  \text{Man}\beta\text{-4GlcNAc}\beta\text{-4GlcNAc} \\    \\  \text{Gal}\beta\text{-4GlcNAc}\beta\text{-2Man}\alpha\text{-3}  \end{array}  $                                                                                                                                                      | - | - |
| 263 | N4                 | $  \begin{array}{c}  \text{Gal}\beta\text{-4GlcNAc}\beta\text{-2Man}\alpha\text{-6} \\    \\  \text{Man}\beta\text{-4GlcNAc}\beta\text{-4GlcNAc} \quad ? \\    \\  \text{Man}\alpha\text{-3}  \end{array}  $                                                                                                                                              | - | - |
| 264 | GlcNac2Man3-AO     | $  \begin{array}{c}  \text{GlcNAc}\beta\text{-2Man}\alpha\text{-6} \\    \\  \text{Man-AO} \\    \\  \text{GlcNAc}\beta\text{-2Man}\alpha\text{-3}  \end{array}  $                                                                                                                                                                                        | - | - |



|     |             |                                                                                                                                                                                                                                     |   |   |
|-----|-------------|-------------------------------------------------------------------------------------------------------------------------------------------------------------------------------------------------------------------------------------|---|---|
| 272 | NA2         | Gal $\beta$ -4GlcNAc $\beta$ -2Man $\alpha$ -6<br> <br>Man $\beta$ -4GlcNAc $\beta$ -4GlcNAc<br> <br>Gal $\beta$ -4GlcNAc $\beta$ -2Man $\alpha$ -3                                                                                 | - | - |
| 273 | NA3         | Gal $\beta$ -4GlcNAc $\beta$ -2Man $\alpha$ -6<br> <br>Man $\beta$ -4GlcNAc $\beta$ -4GlcNAc<br> <br>Gal $\beta$ -4GlcNAc $\beta$ -4Man $\alpha$ -3<br> <br>Gal $\beta$ -4GlcNAc $\beta$ -2                                         | - | - |
| 274 | NA4         | Gal $\beta$ -4GlcNAc $\beta$ -6<br> <br>Gal $\beta$ -4GlcNAc $\beta$ -2Man $\alpha$ -6<br> <br>Man $\beta$ -4GlcNAc $\beta$ -4GlcNAc<br> <br>Gal $\beta$ -4GlcNAc $\beta$ -4Man $\alpha$ -3<br> <br>Gal $\beta$ -4GlcNAc $\beta$ -2 | - | - |
| 275 | Fuc-GlcNAc  | Fuc $\alpha$ -6GlcNAc                                                                                                                                                                                                               | - | - |
| 276 | Man3FGN2    | Man $\alpha$ -6                  Fuc $\alpha$ -6<br>                                    <br>Man $\beta$ -4GlcNAc $\beta$ -4GlcNAc<br> <br>Man $\alpha$ -3                                                                           | - | - |
| 277 | Man3FXyIGN2 | Man $\alpha$ -6<br> <br>Xyl $\beta$ -2Man $\alpha$ -4GlcNAc $\beta$ -4GlcNAc<br>                                    <br>Man $\alpha$ -3                          Fuc $\alpha$ -3                                                    | - | - |
| 278 | NGA2F       | GlcNAc $\beta$ -2Man $\alpha$ -6                  Fuc $\alpha$ -6<br>                                            <br>Man $\beta$ -4GlcNAc $\beta$ -4GlcNAc<br> <br>GlcNAc $\beta$ -2Man $\alpha$ -3                                 | - | - |
| 279 | NA2F        | Gal $\beta$ -4GlcNAc $\beta$ -2Man $\alpha$ -6                  Fuc $\alpha$ -6<br>                                            <br>Man $\beta$ -4GlcNAc $\beta$ -4GlcNAc<br> <br>Gal $\beta$ -4GlcNAc $\beta$ -2Man $\alpha$ -3     | - | - |
| 280 | NA2F-AO     | Gal $\beta$ -4GlcNAc $\beta$ -2Man $\alpha$ -6                  Fuc $\alpha$ -6<br>                                            <br>Man $\beta$ -4GlcNAc $\beta$ -4GlcNAc-AO<br> <br>Gal $\beta$ -4GlcNAc $\beta$ -2Man $\alpha$ -3  | - | - |



|     |                  |                                                                                               |   |   |
|-----|------------------|-----------------------------------------------------------------------------------------------|---|---|
| 292 | GM3              | NeuAc $\alpha$ -3Gal $\beta$ -4Glc $\beta$ -Cer                                               | - | - |
| 293 | GM3(Gc)          | NeuGc $\alpha$ -3Gal $\beta$ -4Glc-Cer                                                        | - | - |
| 294 | Asialo-GM2       | GalNAc $\beta$ -4Gal $\beta$ -4Glc $\beta$ -Cer                                               | - | - |
| 295 | SM2              | GalNAc $\beta$ -4Gal $\beta$ -4Glc $\beta$ -Cer<br> <br>SU-3                                  | - | - |
| 296 | SB2              | SU-3GalNAc $\beta$ -4Gal $\beta$ -4Glc $\beta$ -Cer<br> <br>SU-3                              | - | - |
| 297 | GM2              | GalNAc $\beta$ -4Gal $\beta$ -4Glc $\beta$ -Cer<br> <br>NeuAc $\alpha$ -3                     | - | - |
| 298 | GSC-576          | GalNAc $\beta$ -4Gal $\beta$ -3Glc $\beta$ -C30<br> <br>NeuAc $\alpha$ -3                     | - | - |
| 299 | GSC-108          | GalNAc $\beta$ -4Gal $\beta$ -4Glc $\beta$ -Cer36<br> <br>NeuAc $\alpha$ -3                   | - | - |
| 300 | GSC-193          | GalNAc $\beta$ -4Gal $\beta$ -4Glc $\beta$ -Cer36<br> <br>KDN $\alpha$ -3                     | - | - |
| 301 | Asialo-GM1       | Gal $\beta$ -3GalNAc $\beta$ -4Gal $\beta$ -4Glc $\beta$ -Cer                                 | - | - |
| 302 | Asialo-GM1-Tetra | Gal $\beta$ -3GalNAc $\beta$ -4Gal $\beta$ -4Glc                                              | - | - |
| 303 | SM1a             | Gal $\beta$ -3GalNAc $\beta$ -4Gal $\beta$ -4Glc $\beta$ -Cer<br> <br>SU-3                    | - | - |
| 304 | SB1a             | SU-3Gal $\beta$ -3GalNAc $\beta$ -4Gal $\beta$ -4Glc $\beta$ -Cer<br> <br>SU-3                | - | - |
| 305 | GSC-335          | SU-6<br> <br>NeuAc $\alpha$ -3Gal $\beta$ -3GalNAc $\beta$ -4Gal $\beta$ -4Glc $\beta$ -Cer36 | - | - |
| 306 | GM1              | Gal $\beta$ -3GalNAc $\beta$ -4Gal $\beta$ -4Glc $\beta$ -Cer<br> <br>NeuAc $\alpha$ -3       | - | - |
| 307 | GM1-penta        | Gal $\beta$ -3GalNAc $\beta$ -4Gal $\beta$ -4Glc<br> <br>NeuAc $\alpha$ -3                    | - | - |
| 308 | GM1(Gc)          | Gal $\beta$ -3GalNAc $\beta$ -4Gal $\beta$ -4Glc $\beta$ -Cer<br> <br>NeuGc $\alpha$ -3       | - | - |
| 309 | GM1(Gc)-penta    | Gal $\beta$ -3GalNAc $\beta$ -4Gal $\beta$ -4Glc<br> <br>NeuGc $\alpha$ -3                    | - | - |



|     |                          |                                                                                      |    |   |
|-----|--------------------------|--------------------------------------------------------------------------------------|----|---|
| 326 | GalNAc-Ser               | GalNAc-Ser                                                                           | -  | - |
| 327 | GalNAc-Thr               | GalNAc-Thr                                                                           | -  | - |
| 328 | BSM-Di-A1-AO             | NeuGc $\alpha$ -6GalNAc-AO                                                           | -  | - |
| 329 | BSM-Di-A2-AO             | NeuAc $\alpha$ -6GalNAc-AO                                                           | -  | - |
| 330 | GalNAc $\alpha$ -3GalNAc | GalNAc $\alpha$ -3GalNAc                                                             | -  | - |
| 331 | Gal $\beta$ -3GalNAc     | Gal $\beta$ -3GalNAc                                                                 | -  | - |
| 332 | Gal $\beta$ -3GalNAc-AO  | Gal $\beta$ -3GalNAc-AO                                                              | -  | - |
| 333 | Gal $\beta$ -6GalNAc     | Gal $\beta$ -6GalNAc                                                                 | 8  | - |
| 334 | Gal $\beta$ -6GalNAc-AO  | Gal $\beta$ -6GalNAc-AO                                                              | -  | - |
| 335 | Man-Ser                  | Man $\alpha$ -Ser                                                                    | -  | - |
| 336 | Man-Ser-Succ             | Man-Ser-Succ                                                                         | -  | - |
| 337 | Man-Thr                  | Man-Thr                                                                              | 15 | - |
| 338 | Man-Thr-Succ             | Man-Thr-Succ                                                                         | -  | - |
| 339 | A8/1                     | GlcNAc $\alpha$ -4Gal $\beta$ -OX                                                    | -  | - |
| 340 | A8/2                     | SU-6<br> <br>Fuc $\alpha$ -3GlcNAc $\beta$ -OY                                       | -  | - |
| 341 | A15/1                    | SU-6GlcNAc $\beta$ -OY                                                               | -  | - |
| 342 | A15/3                    | GlcNAc $\alpha$ -4Gal $\beta$ -3Gal $\beta$ -OX<br> <br>Fuc $\alpha$ -2              | -  | - |
| 343 | B13/a                    | GlcA $\beta$ -3Gal $\beta$ -3GlcNAc $\beta$ -OX                                      | -  | - |
| 344 | Notch-1                  | Fuc $\alpha$ -Thr                                                                    | -  | - |
| 345 | Notch-2                  | GlcNAc $\beta$ -3Fuc $\alpha$ -Thr                                                   | -  | - |
| 346 | Notch-3                  | Gal $\beta$ -4GlcNAc $\beta$ -3Fuc $\alpha$ -Thr                                     | -  | 3 |
| 347 | GSC-488                  | NeuAc $\alpha$ -3Gal $\beta$ -3GalNAc $\beta$ -C30                                   | -  | - |
| 348 | GSC-491                  | NeuAc $\alpha$ -3Gal $\beta$ -3 (6-deoxy-6-CH <sub>2</sub> COOH) GalNAc $\beta$ -C30 | -  | - |
| 349 | GSC-489                  | SU-6<br> <br>NeuAc $\alpha$ -3Gal $\beta$ -3GalNAc $\beta$ -C30                      | -  | - |
| 350 | DST                      | NeuAc $\alpha$ -3Gal $\beta$ -3GalNAc<br> <br>NeuAc $\alpha$ -6                      | -  | - |
| 351 | DST-AO                   | NeuAc $\alpha$ -3Gal $\beta$ -3GalNAc-AO<br> <br>NeuAc $\alpha$ -6                   | 23 | - |
| 352 | GSC-490                  | NeuAc $\alpha$ -3Gal $\beta$ -3GalNAc $\beta$ -C30<br> <br>NeuAc $\alpha$ -6         | -  | - |
| 353 | GlcNAc $\beta$ -3Fuc-AO  | GlcNAc $\beta$ -3Fuc-AO                                                              | -  | - |







Prostate cancer-associated Antigen F77

|     |               |                                                                     |   |     |
|-----|---------------|---------------------------------------------------------------------|---|-----|
| 396 | Malto-2-AO    | Glcα-4Glc-AO                                                        | - | -   |
| 397 | Malto-3-AO    | Glcα-4Glcα-4Glc-AO                                                  | - | -   |
| 398 | Malto-4-AO    | Glcα-4Glcα-4Glcα-4Glc-AO                                            | - | -   |
| 399 | Malto-5-AO    | Glcα-4Glcα-4Glcα-4Glcα-4Glc-AO                                      | - | -   |
| 400 | Malto-6-AO    | Glcα-4Glcα-4Glcα-4Glcα-4Glcα-4Glc-AO                                | - | -   |
| 401 | Malto-7-AO    | Glcα-4Glcα-4Glcα-4Glcα-4Glcα-4Glcα-4Glc-AO                          | - | -   |
| 402 | Malto-8-AO    | Glcα-4Glcα-4Glcα-4Glcα-4Glcα-4Glcα-4Glcα-4Glc-AO*                   | - | -   |
| 403 | Malto-9-AO    | Glcα-4Glcα-4Glcα-4Glcα-4Glcα-4Glcα-4Glcα-4Glcα-4Glc-AO*             | - | -   |
| 404 | Malto-10-AO   | Glcα-4Glcα-4Glcα-4Glcα-4Glcα-4Glcα-4Glcα-4Glcα-4Glcα-4Glc-AO*       | - | -   |
| 405 | Malto-11-AO   | Glcα-4Glcα-4Glcα-4Glcα-4Glcα-4Glcα-4Glcα-4Glcα-4Glcα-4Glcα-4Glc-AO* | - | -   |
| 406 | Malto-12-AO   | Glcα-4Glcα-4Glcα-4Glcα-4Glcα-4Glcα-4Glcα-4Glcα-4Glcα-4Glcα-4Glc-AO* | - | -   |
| 407 | Malto-13-AO   | Glcα-4Glcα-4Glcα-4Glcα-4Glcα-4Glcα-4Glcα-4Glcα-4Glcα-4Glcα-4Glc-AO* | - | -   |
| 408 | Dextran-2-AO  | Glcα-6Glc-AO                                                        | - | -   |
| 409 | Dextran-3-AO  | Glcα-6Glcα-6Glc-AO                                                  | - | -   |
| 410 | Dextran-4-AO  | Glcα-6Glcα-6Glcα-6Glc-AO                                            | - | -   |
| 411 | Dextran-5-AO  | Glcα-6Glcα-6Glcα-6Glcα-6Glc-AO                                      | - | -   |
| 412 | Dextran-6-AO  | Glcα-6Glcα-6Glcα-6Glcα-6Glcα-6Glc-AO                                | - | 8   |
| 413 | Dextran-7-AO  | Glcα-6Glcα-6Glcα-6Glcα-6Glcα-6Glcα-6Glc-AO                          | - | 59  |
| 414 | Dextran-8-AO  | Glcα-6Glcα-6Glcα-6Glcα-6Glcα-6Glcα-6Glcα-6Glc-AO*                   | - | 166 |
| 415 | Dextran-9-AO  | Glcα-6Glcα-6Glcα-6Glcα-6Glcα-6Glcα-6Glcα-6Glcα-6Glc-AO*             | - | 74  |
| 416 | Dextran-10-AO | Glcα-6Glcα-6Glcα-6Glcα-6Glcα-6Glcα-6Glcα-6Glcα-6Glcα-6Glc-AO*       | - | 60  |
| 417 | Dextran-11-AO | Glcα-6Glcα-6Glcα-6Glcα-6Glcα-6Glcα-6Glcα-6Glcα-6Glcα-6Glcα-6Glc-AO* | - | 145 |
| 418 | Dextran-12-AO | Glcα-6Glcα-6Glcα-6Glcα-6Glcα-6Glcα-6Glcα-6Glcα-6Glcα-6Glcα-6Glc-AO* | - | 109 |
| 419 | Dextran-13-AO | Glcα-6Glcα-6Glcα-6Glcα-6Glcα-6Glcα-6Glcα-6Glcα-6Glcα-6Glcα-6Glc-AO* | - | 37  |
| 420 | Lam-2-AO      | Glcβ-3Glc-AO                                                        | - | -   |
| 421 | Lam-3-AO      | Glcβ-3Glcβ-3Glc-AO                                                  | - | -   |
| 422 | Lam-4-AO      | Glcβ-3Glcβ-3Glcβ-3Glc-AO                                            | - | -   |
| 423 | Lam-5-AO      | Glcβ-3Glcβ-3Glcβ-3Glcβ-3Glc-AO                                      | - | -   |
| 424 | Lam-6-AO      | Glcβ-3Glcβ-3Glcβ-3Glcβ-3Glcβ-3Glc-AO                                | - | -   |

|                      |             |                                                                                 |   |   |
|----------------------|-------------|---------------------------------------------------------------------------------|---|---|
| 425                  | Lam-7-AO    | Glcβ-3Glcβ-3Glcβ-3Glcβ-3Glcβ-3Glcβ-3Glc-AO                                      | - | - |
| 426                  | Curd-8-AO   | Glcβ-3Glcβ-3Glcβ-3Glcβ-3Glcβ-3Glcβ-3Glcβ-3Glc-AO*                               | - | - |
| 427                  | Curd-9-AO   | Glcβ-3Glcβ-3Glcβ-3Glcβ-3Glcβ-3Glcβ-3Glcβ-3Glcβ-3Glc-AO*                         | - | - |
| 428                  | Curd-10-AO  | Glcβ-3Glcβ-3Glcβ-3Glcβ-3Glcβ-3Glcβ-3Glcβ-3Glcβ-3Glcβ-3Glc-AO*                   | - | - |
| 429                  | Curd-11-AO  | Glcβ-3Glcβ-3Glcβ-3Glcβ-3Glcβ-3Glcβ-3Glcβ-3Glcβ-3Glcβ-3Glcβ-3Glc-AO*             | - | - |
| 430                  | Curd-12-AO  | Glcβ-3Glcβ-3Glcβ-3Glcβ-3Glcβ-3Glcβ-3Glcβ-3Glcβ-3Glcβ-3Glcβ-3Glcβ-3Glc-AO*       | - | - |
| 431                  | Curd-13-AO  | Glcβ-3Glcβ-3Glcβ-3Glcβ-3Glcβ-3Glcβ-3Glcβ-3Glcβ-3Glcβ-3Glcβ-3Glcβ-3Glcβ-3Glc-AO* | - | - |
| 432                  | Cello-2-AO  | Glcβ-4Glc-AO                                                                    | - | - |
| 433                  | Cello-3-AO  | Glcβ-4Glcβ-4Glc-AO                                                              | - | - |
| 434                  | Cello-4-AO  | Glcβ-4Glcβ-4Glcβ-4Glc-AO                                                        | - | - |
| 435                  | Cello-5-AO  | Glcβ-4Glcβ-4Glcβ-4Glcβ-4Glc-AO                                                  | - | - |
| 436                  | Cello-6-AO  | Glcβ-4Glcβ-4Glcβ-4Glcβ-4Glcβ-4Glc-AO                                            | - | - |
| 437                  | Cello-7-AO  | Glcβ-4Glcβ-4Glcβ-4Glcβ-4Glcβ-4Glcβ-4Glc-AO                                      | - | - |
| 438                  | Cello-8-AO  | Glcβ-4Glcβ-4Glcβ-4Glcβ-4Glcβ-4Glcβ-4Glcβ-4Glc-AO*                               | - | - |
| 439                  | Cello-9-AO  | Glcβ-4Glcβ-4Glcβ-4Glcβ-4Glcβ-4Glcβ-4Glcβ-4Glcβ-4Glc-AO*                         | - | - |
| 440                  | Cello-10-AO | Glcβ-4Glcβ-4Glcβ-4Glcβ-4Glcβ-4Glcβ-4Glcβ-4Glcβ-4Glcβ-4Glc-AO*                   | - | - |
| 441                  | Cello-11-AO | Glcβ-4Glcβ-4Glcβ-4Glcβ-4Glcβ-4Glcβ-4Glcβ-4Glcβ-4Glcβ-4Glcβ-4Glc-AO*             | - | - |
| 442                  | Cello-12-AO | Glcβ-4Glcβ-4Glcβ-4Glcβ-4Glcβ-4Glcβ-4Glcβ-4Glcβ-4Glcβ-4Glcβ-4Glcβ-4Glc-AO*       | - | - |
| 443                  | Cello-13-AO | Glcβ-4Glcβ-4Glcβ-4Glcβ-4Glcβ-4Glcβ-4Glcβ-4Glcβ-4Glcβ-4Glcβ-4Glcβ-4Glcβ-4Glc-AO* | - | - |
| 444                  | Pust-2-AO   | Glcβ-6Glc-AO                                                                    | - | - |
| 445                  | Pust-3-AO   | Glcβ-6Glcβ-6Glc-AO                                                              | - | - |
| 446                  | Pust-4-AO   | Glcβ-6Glcβ-6Glcβ-6Glc-AO                                                        | - | - |
| 447                  | Pust-5-AO   | Glcβ-6Glcβ-6Glcβ-6Glcβ-6Glc-AO                                                  | - | - |
| 448                  | Pust-6-AO   | Glcβ-6Glcβ-6Glcβ-6Glcβ-6Glcβ-6Glc-AO                                            | - | - |
| 449                  | Pust-7-AO   | Glcβ-6Glcβ-6Glcβ-6Glcβ-6Glcβ-6Glcβ-6Glc-AO                                      | - | - |
| 450                  | Pust-8-AO   | Glcβ-6Glcβ-6Glcβ-6Glcβ-6Glcβ-6Glcβ-6Glcβ-6Glc-AO*                               | - | - |
| 451                  | Glc2β(2).AO | Glcβ-2Glc-AO                                                                    | - | - |
| <b>Miscellaneous</b> |             |                                                                                 |   |   |
| 452                  | Gal         | Gal                                                                             | - | - |
| 453                  | Gal-AO      | Gal-AO                                                                          | - | - |
| 454                  | GalNAc      | GalNAc                                                                          | - | - |
| 455                  | GalNAc-AO   | GalNAc-AO                                                                       | - | - |
| 456                  | Glc         | Glc                                                                             | - | - |
| 457                  | Glc-AO      | Glc-AO                                                                          | - | - |
| 458                  | GN          | GlcNAc                                                                          | - | - |

|     |                          |                                                                                                                                                                                                                |   |   |
|-----|--------------------------|----------------------------------------------------------------------------------------------------------------------------------------------------------------------------------------------------------------|---|---|
| 459 | GN-AO                    | GlcNAc-AO                                                                                                                                                                                                      | - | - |
| 460 | Man                      | Man                                                                                                                                                                                                            | - | - |
| 461 | Man-AO                   | Man-AO                                                                                                                                                                                                         | - | - |
| 462 | Fuc                      | Fuc                                                                                                                                                                                                            | - | - |
| 463 | Fuc-AO                   | Fuc-AO                                                                                                                                                                                                         | - | - |
| 464 | NeuAc                    | NeuAc                                                                                                                                                                                                          | - | - |
| 465 | NeuAc-AO                 | NeuAc-AO                                                                                                                                                                                                       | - | - |
| 466 | NeuGc                    | NeuGc                                                                                                                                                                                                          | - | - |
| 467 | NeuGc-AO                 | NeuGc-AO                                                                                                                                                                                                       | - | - |
| 468 | Rha                      | Rha                                                                                                                                                                                                            | - | - |
| 469 | Rha-AO                   | Rha-AO                                                                                                                                                                                                         | - | - |
| 470 | Gal $\alpha$ -6Glc-AO    | Gal $\alpha$ -6Glc-AO                                                                                                                                                                                          | - | - |
| 471 | (6P)-Glc-AO              | P-6Glc-AO                                                                                                                                                                                                      | - | - |
| 472 | (6P)-Man                 | P-6Man                                                                                                                                                                                                         | - | - |
| 473 | (6P)-Man-AO              | P-6Man-AO                                                                                                                                                                                                      | - | - |
| 474 | (6P)-Man5                | P-6Man $\alpha$ -3Man $\alpha$ -3Man $\alpha$ -3Man $\alpha$ -2Man                                                                                                                                             | - | - |
| 475 | (6P)-Fructose-AO         | P-6Fructose-AO                                                                                                                                                                                                 | - | - |
| 476 | SU-Tyr                   | SU-Tyr                                                                                                                                                                                                         | - | - |
| 477 | SU-Cholesterol           | SU-Cholesterol                                                                                                                                                                                                 | - | - |
| 478 | GN-Asn                   | GlcNAc-Asn                                                                                                                                                                                                     | - | - |
| 479 | GlcNAc $\beta$ 1-2Fuc-AO | GlcNAc $\beta$ 1-2Fuc-AO                                                                                                                                                                                       | - | - |
| 480 | GlcNAc $\beta$ 1-4Fuc-AO | GlcNAc $\beta$ 1-4Fuc-AO                                                                                                                                                                                       | - | - |
| 481 | Xyl3Glc4                 | $\begin{array}{c} \text{Glc}\beta\text{-4Glc}\beta\text{-4Glc}\beta\text{-4Glc} \\   \quad   \quad   \\ \text{Xyl}\alpha\text{-6} \quad \text{Xyl}\alpha\text{-6} \quad \text{Xyl}\alpha\text{-6} \end{array}$ | - | - |
| 482 | GSC-284                  | $\begin{array}{c} \text{GalNAc}\beta\text{-6Gal}\beta\text{-4Glc}\beta\text{-Cer36} \\   \\ \text{NeuAc}\alpha\text{-3} \end{array}$                                                                           | - | - |
| 483 | GSC-575                  | $\begin{array}{c} \text{GalNAc}\beta\text{-4Gal}\beta\text{-3Gal}\beta\text{-C30} \\   \\ \text{NeuAc}\alpha\text{-3} \end{array}$                                                                             | - | - |
| 484 | GSC-70                   | NeuAc $\alpha$ -6Gal $\beta$ -6GalNAc $\beta$ -4Gal $\beta$ -4Glc $\beta$ -Cer36                                                                                                                               | - | - |
| 485 | GSC-154                  | $\begin{array}{c} \text{NeuAc}\alpha\text{-3Gal}\beta\text{-4GlcNAc}\beta\text{-6Gal}\beta\text{-4Glc}\beta\text{-Cer36} \\   \\ \text{Fuca}\alpha\text{-3} \end{array}$                                       | - | - |
| 486 | GSC-446                  | NeuAc $\alpha$ -3Gal $\beta$ -4GlcNAc $\beta$ -6GalNAc $\alpha$ -3Gal $\beta$ -4Glc-C30                                                                                                                        | - | - |
| 487 | GSC-441                  | NeuAc $\alpha$ -3Gal $\beta$ -4GlcNAc $\beta$ -6GalNAc $\alpha$ -3Gal $\beta$ -4Glc $\beta$ -C30                                                                                                               | - | - |

|     |                                             |                                                                                                                          |   |   |
|-----|---------------------------------------------|--------------------------------------------------------------------------------------------------------------------------|---|---|
| 488 | GSC-384                                     | NeuAc $\alpha$ -3Gal $\beta$ -4GlcNAc $\beta$ -4GalNAc $\beta$ -3Gal $\beta$ -4Glc $\beta$ -C30<br> <br>Fuca $\alpha$ -3 | 8 | - |
| 489 | Glc( $\alpha$ 6, $\alpha$ 4, $\alpha$ 4)    | Glc $\alpha$ -6Glc $\alpha$ -4Glc $\alpha$ -4Glc                                                                         | - | - |
| 490 | Glc( $\alpha$ 6, $\alpha$ 4, $\alpha$ 4)-AO | Glc $\alpha$ -6Glc $\alpha$ -4Glc $\alpha$ -4Glc-AO                                                                      | - | - |
| 491 | O1.AO                                       | GlcNAc $\beta$ -3<br> <br>Gal-AO<br> <br>GlcNAc $\beta$ -6                                                               | - | - |
| 492 | Rutinose.AO                                 | Rha $\alpha$ -gGlc-AO                                                                                                    | - | - |

<sup>a</sup>Pos, Probe position in the screening microarray.

<sup>b</sup>The oligosaccharide probes are all lipid-linked, neoglycolipids (NGLs) or glycosylceramides and are from the collection assembled in the course of research in Glycosciences Laboratory. Unless otherwise specified the NGLs are prepared from reducing oligosaccharides by reductive amination with the amino lipid, 1,2-dihexadecyl-*sn*-glycero-3-phosphoethanolamine (DHPE) (Chai,W, et al, Methods Enzymol. 362, 160-195, 2003); AO, NGLs prepared from reducing oligosaccharides by oxime ligation with an aminoxy (AO) functionalized DHPE (Liu et al., Chem. Biol. 14, 847–859, 2007); Cer, natural glycolipids with various ceramide moieties; CerA and CerB denote different natural ceramides; Cer36 and Cer42, synthetic glycolipids with ceramide having a total of 32 and 42 carbon atoms, respectively; C30, a synthetic lipid [2-(tetradecyl)hexadecanol] with 30 carbon atoms. UA, 4,5-unsaturated hexuronic acid; aMan, 2,5-anhydro-mannose; aGal, 3,6-anhydro-galactose.

<sup>c</sup>Less than 1.

\*Major component.

Supplemental Table S2 Compositions of the reductively released *O*-glycans in the Bio-Gel P6 fractions 1-7, deduced from MALDI-MS analysis.

| Fractions | [M+Na] <sup>+</sup> | Composition                | Fractions                  | [M+Na] <sup>+</sup>        | Composition                |                            |                            |
|-----------|---------------------|----------------------------|----------------------------|----------------------------|----------------------------|----------------------------|----------------------------|
| 7         | 814                 | Hex1.HexNAc2.HexNAcol      | 2                          | 1430                       | Fuc2.Hex3.HexNAc2.HexNAcol |                            |                            |
|           | 919                 | Fuc1.Hex2.HexNAc1.HexNAcol |                            | 1471                       | Fuc2.Hex2.HexNAc3.HexNAcol |                            |                            |
|           | 935                 | Hex3.HexNAc1.HexNAcol      |                            | 1487                       | Fuc1.Hex3.HexNAc3.HexNAcol |                            |                            |
|           | 960                 | Fuc1.Hex1.HexNAc2.HexNAcol |                            | 1544                       | Hex3.HexNAc4.HexNAcol      |                            |                            |
|           | 976                 | Hex2.HexNAc2.HexNAcol      |                            | 1633                       | Fuc2.Hex3.HexNAc3.HexNAcol |                            |                            |
|           | 1017                | Hex1.HexNAc3.HexNAcol      |                            | 1649                       | Fuc1.Hex4.HexNAc3.HexNAcol |                            |                            |
|           | 1065                | Fuc2.Hex2.HexNAc1.HexNAcol |                            | 1690                       | Fuc1.Hex3.HexNAc4.HexNAcol |                            |                            |
|           | 1081                | Fuc1.Hex3.HexNAc1.HexNAcol |                            | 1795                       | Fuc2.Hex4.HexNAc3.HexNAcol |                            |                            |
|           | 1122                | Fuc1.Hex2.HexNAc2.HexNAcol |                            | 1                          | 1487                       | Fuc1.Hex3.HexNAc3.HexNAcol |                            |
|           | 1138                | Hex3.HexNAc2.HexNAcol      |                            |                            | 1544                       | Hex3.HexNAc4.HexNAcol      |                            |
|           | 1179                | Hex2.HexNAc3.HexNAcol      |                            |                            | 1633                       | Fuc2.Hex3.HexNAc3.HexNAcol |                            |
|           | 6                   | 1122                       |                            |                            | Fuc1.Hex2.HexNAc2.HexNAcol | 1690                       | Fuc1.Hex3.HexNAc4.HexNAcol |
|           |                     | 1179                       |                            |                            | Hex2.HexNAc3.HexNAcol      | 1747                       | Hex3.HexNAc5.HexNAcol      |
| 1325      |                     | Fuc1.Hex2.HexNAc3.HexNAcol | 1795                       |                            | Fuc2.Hex4.HexNAc3.HexNAcol |                            |                            |
| 5         | 1122                | Fuc1.Hex2.HexNAc2.HexNAcol | 1894                       |                            | Fuc1.Hex3.HexNAc5.HexNAcol |                            |                            |
|           | 1179                | Hex2.HexNAc3.HexNAcol      | 1852                       |                            | Fuc1.Hex4.HexNAc4.HexNAcol |                            |                            |
|           | 1284                | Fuc1.Hex3.HexNAc2.HexNAcol | 1942                       |                            | Fuc3.Hex4.HexNAc3.HexNAcol |                            |                            |
|           | 1325                | Fuc1.Hex2.HexNAc3.HexNAcol | 1999                       |                            | Fuc2.Hex4.HexNAc4.HexNAcol |                            |                            |
|           | 1430                | Fuc2.Hex3.HexNAc2.HexNAcol | 2055                       |                            | Fuc1.Hex4.HexNAc5.HexNAcol |                            |                            |
| 4         | 1179                | Hex2.HexNAc3.HexNAcol      | 1                          |                            | 1747                       | Hex3.HexNAc5.HexNAcol      |                            |
|           | 1284                | Fuc1.Hex3.HexNAc2.HexNAcol |                            |                            | 1836                       | Fuc2.Hex3.HexNAc4.HexNAcol |                            |
|           | 1325                | Fuc1.Hex2.HexNAc3.HexNAcol |                            | 1852                       | Fuc1.Hex4.HexNAc4.HexNAcol |                            |                            |
|           | 1341                | Hex3.HexNAc3.HexNAcol      |                            | 1894                       | Fuc1.Hex3.HexNAc5.HexNAcol |                            |                            |
|           | 1382                | Hex2.HexNAc4.HexNAcol      |                            | 1909                       | Hex4.HexNAc5.HexNAcol      |                            |                            |
|           | 1430                | Fuc2.Hex3.HexNAc2.HexNAcol |                            | 1998                       | Fuc2.Hex4.HexNAc4.HexNAcol |                            |                            |
|           | 1471                | Fuc2.Hex2.HexNAc3.HexNAcol |                            | 2055                       | Fuc1.Hex4.HexNAc5.HexNAcol |                            |                            |
|           | 1487                | Fuc1.Hex3.HexNAc3.HexNAcol |                            | 2112                       | Hex4.HexNAc6.HexNAcol      |                            |                            |
|           | 1503                | Hex4.HexNAc3.HexNAcol      |                            | 2160                       | Fuc2.Hex5.HexNAc4.HexNAcol |                            |                            |
|           | 1633                | Fuc2.Hex3.HexNAc3.HexNAcol |                            | 2201                       | Fuc2.Hex4.HexNAc5.HexNAcol |                            |                            |
|           | 1690                | Fuc1.Hex3.HexNAc4.HexNAcol |                            | 2258                       | Fuc1.Hex4.HexNAc6.HexNAcol |                            |                            |
|           | 3                   | 1325                       |                            | Fuc1.Hex2.HexNAc3.HexNAcol | 2306                       | Fuc3.Hex5.HexNAc4.HexNAcol |                            |
|           |                     | 1382                       |                            | Hex2.HexNAc4.HexNAcol      | 2364                       | Fuc2.Hex5.HexNAc5.HexNAcol |                            |
|           |                     |                            |                            |                            | 2405                       | Fuc2.Hex4.HexNAc6.HexNAcol |                            |
|           |                     |                            |                            | 2421                       | Fuc1.Hex5.HexNAc6.HexNAcol |                            |                            |
|           |                     | 2510                       | Fuc3.Hex5.HexNAc5.HexNAcol |                            |                            |                            |                            |
|           |                     | 2567                       | Fuc2.Hex5.HexNAc6.HexNAcol |                            |                            |                            |                            |

Abbreviations: dHex, deoxyhexose; Hex, hexose; HexNAc, *N*-acetylhexosamine, HexNAcol, *N*-acetylhexosaminitol.

Supplemental Table S3 Compositions of the NGLs derived from the reductively released *O*-glycans in Bio-Gel P6 fractions 1-7, deduced from MALDI-MS analysis.

| Fractions | [M+H] <sup>+</sup> | Composition          | Fractions | [M+H] <sup>+</sup> | Composition          | Fractions | [M+H] <sup>+</sup> | Composition          |
|-----------|--------------------|----------------------|-----------|--------------------|----------------------|-----------|--------------------|----------------------|
| 7         | 1218               | Hex1-OX              |           | 2298               | Fuc1.Hex3.HexNAc3-OX |           | 1991               | Hex2.HexNAc3-OX      |
|           | 1364               | Fuc1.Hex1-OX         |           | 2355               | Hex3.HexNAc4-OX      |           | 2035               | Fuc1.Hex2.HexNAc3-OY |
|           | 1421               | Hex1.HexNAc1-OX      | 3         |                    |                      |           | 2095               | Fuc1.Hex3.HexNAc2-OX |
|           | 1466               | Fuc1.Hex1.HexNAc1-OY |           | 955                | -OY                  |           | 2137               | Fuc1.Hex2.HexNAc3-OX |
|           | 1523               | Hex1.HexNAc2-OY      |           | 1057               | -OX                  |           | 2153               | Hex3.HexNAc3-OX      |
|           |                    |                      |           | 1158               | HexNAc1-OY           |           | 2241               | Fuc2.Hex3.HexNAc2-OX |
| 6         |                    |                      |           | 1321               | Hex1.HexNAc1-OY      |           | 2298               | Fuc1.Hex3.HexNAc3-OX |
|           | 1219               | Hex1-OX              |           | 1364               | Fuc1.Hex1-OX         |           | 2355               | Hex3.HexNAc4-OX      |
|           | 1365               | Fuc1.Hex1-OX         |           | 1422               | Hex1.HexNAc1-OX      |           | 2445               | Fuc2.Hex3.HexNAc3-OX |
|           | 1422               | Hex1.HexNAc1-OX      |           | 1467               | Fuc1.Hex1.HexNAc1-OY |           | 2505               | Fuc1.Hex3.HexNAc4-OX |
|           | 1467               | Fuc1.Hex1.HexNAc1-OY |           | 1524               | Hex1.HexNAc2-OY      |           | 2648               | Fuc2.Hex3.HexNAc4-OX |
|           | 1524               | Hex1.HexNAc2-OY      |           | 1568               | Fuc1.Hex1.HexNAc1-OX |           | 2693               | Fuc2.Hex2.HexNAc5-OX |
|           |                    |                      |           | 1670               | Fuc1.Hex1.HexNAc2-OY | 1         |                    |                      |
| 5         |                    |                      |           | 1730               | Fuc1.Hex2.HexNAc1-OX |           | 955                | -OY                  |
|           | 955                | -OY                  |           | 1787               | Hex2.HexNAc2-OX      |           | 1158               | HexNAc1-OY           |
|           | 1158               | HexNAc1-OY           |           | 1890               | Hex2.HexNAc3-OY      |           | 1218               | Hex1-OX              |
|           | 1422               | Hex1.HexNAc1-OX      |           | 1934               | Fuc1.Hex2.HexNAc2-OX |           | 1321               | Hex1.HexNAc1-OY      |
|           | 1524               | Hex1.HexNAc2-OY      |           | 1991               | Hex2.HexNAc3-OX      |           | 1422               | Hex1.HexNAc1-OX      |
|           | 1568               | Fuc1.Hex1.HexNAc1-OX |           | 2095               | Fuc1.Hex3.HexNAc2-OX |           | 1467               | Fuc1.Hex1.HexNAc1-OY |
|           | 1670               | Fuc1.Hex1.HexNAc2-OY |           | 2241               | Fuc2.Hex3.HexNAc2-OX |           | 1524               | Hex1.HexNAc2-OY      |
|           | 1787               | Hex2.HexNAc2-OX      |           | 2298               | Fuc1.Hex3.HexNAc3-OX |           | 1568               | Fuc1.Hex1.HexNAc1-OX |
|           | 1934               | Fuc1.Hex2.HexNAc2-OX | 2         |                    |                      |           | 1670               | Fuc1.Hex1.HexNAc2-OY |
|           |                    |                      |           | 955                | -OY                  |           | 1787               | Hex2.HexNAc2-OX      |
| 4         |                    |                      |           | 1057               | -OX                  |           | 1934               | Fuc1.Hex2.HexNAc2-OX |
|           | 955                | -OY                  |           | 1158               | HexNAc1-OY           |           | 1991               | Hex2.HexNAc3-OX      |
|           | 1158               | HexNAc1-OY           |           | 1218               | Hex1-OX              |           | 2137               | Fuc1.Hex2.HexNAc3-OX |
|           | 1321               | Hex1.HexNAc1-OY      |           | 1321               | Hex1.HexNAc1-OY      |           | 2298               | Fuc1.Hex3.HexNAc3-OX |
|           | 1422               | Hex1.HexNAc1-OX      |           | 1364               | Fuc1.Hex1-OX         |           | 2355               | Hex3.HexNAc4-OX      |
|           | 1524               | Hex1.HexNAc2-OY      |           | 1422               | Hex1.HexNAc1-OX      |           | 2399               | Hex2.HexNAc5-OX      |
|           | 1568               | Fuc1.Hex1.HexNAc1-OX |           | 1467               | Fuc1.Hex1.HexNAc1-OY |           | 2445               | Fuc2.Hex3.HexNAc3-OX |
|           | 1670               | Fuc1.Hex1.HexNAc2-OY |           | 1524               | Hex1.HexNAc2-OY      |           | 2501               | Fuc1.Hex3.HexNAc4-OX |
|           | 1730               | Fuc1.Hex2.HexNAc1-OX |           | 1670               | Fuc1.Hex1.HexNAc2-OY |           | 2545               | Fuc1.Hex2.HexNAc5-OX |
|           | 1787               | Hex2.HexNAc2-OX      |           | 1730               | Fuc1.Hex2.HexNAc1-OX |           | 2607               | Fuc2.Hex4.HexNAc3-OX |
|           | 1934               | Fuc1.Hex2.HexNAc2-OX |           | 1787               | Hex2.HexNAc2-OX      |           | 2648               | Fuc2.Hex3.HexNAc4-OX |
|           | 1991               | Hex2.HexNAc3-OX      |           | 1890               | Hex2.HexNAc3-OY      |           | 2692               | Fuc2.Hex2.HexNAc5-OX |
|           | 2095               | Fuc1.Hex3.HexNAc2-OX |           | 1934               | Fuc1.Hex2.HexNAc2-OX |           | 2749               | Fuc1.Hex2.HexNAc6-OX |
|           | 2241               | Fuc2.Hex3.HexNAc2-OX |           |                    |                      |           | 2811               | Fuc2.Hex4.HexNAc4-OX |

Abbreviations: dHex, deoxyhexose; Hex, hexose; HexNAc, *N*-acetylhexosamine, HexNAc<sub>ol</sub>, *N*-acetylhexosaminitol. -OX and -OY are the 3- and 6- linked fragments of core GalNAc after periodate oxidation as further explained in footnote of Table 3.



Supplemental Table S4 Oligosaccharide probes included in the newly generated F77/Ii focused array and the binding signals (means of the fluorescence intensities) elicited with mAb F77 at 5 fmol probe per spot (taken from Fig 7).

| Pos <sup>a</sup> | Probe <sup>b</sup> | Sequence                                                                                                                                                                                                                                                                                                                                                                                                                         | Antigen activity  | Binding Signals of mAb F77 (5fmol/probe spot) |
|------------------|--------------------|----------------------------------------------------------------------------------------------------------------------------------------------------------------------------------------------------------------------------------------------------------------------------------------------------------------------------------------------------------------------------------------------------------------------------------|-------------------|-----------------------------------------------|
| 1                | LNFP-I             | Fu $\alpha$ -2Gal $\beta$ -3GlcNAc $\beta$ -3Gal $\beta$ -4Glc-DH                                                                                                                                                                                                                                                                                                                                                                | Linear H type 1   | - <sup>c</sup>                                |
| 2                | LnNFPI             | Fu $\alpha$ -2Gal $\beta$ -4GlcNAc $\beta$ -3Gal $\beta$ -4Glc-DH                                                                                                                                                                                                                                                                                                                                                                | Linear H type 2   | -                                             |
| 3                | H2 (& H2+Fuc)      | Fu $\alpha$ -2Gal $\beta$ -4GlcNAc $\beta$ -3Gal $\beta$ -4GlcNAc $\beta$ -3Gal $\beta$ -4GlcNAc $\beta$ -Cer                                                                                                                                                                                                                                                                                                                    | Linear H type 2   | -                                             |
| 4                | H3 (& H3-Fuc)      | <pre>       Gal<math>\beta</math>-4GlcNAc<math>\beta</math>-6         Fu<math>\alpha</math>-2          Gal<math>\beta</math>-4GlcNAc<math>\beta</math>-3Gal<math>\beta</math>-4Glc-Cer                               Gal<math>\beta</math>-4GlcNAc<math>\beta</math>-3                 Fu<math>\alpha</math>-2 </pre>                                                                                                            | Branched H type 2 | 34711                                         |
| 5                | A-Hexa-T1          | <pre> GalNAc<math>\alpha</math>-3Gal<math>\beta</math>-3GlcNAc<math>\beta</math>-3Gal<math>\beta</math>-4Glc-DH   Fu<math>\alpha</math>-2 </pre>                                                                                                                                                                                                                                                                                 | Linear A type 1   | -                                             |
| 6                | A-Hexa-T2          | <pre> GalNAc<math>\alpha</math>-3Gal<math>\beta</math>-4GlcNAc<math>\beta</math>-3Gal<math>\beta</math>-4Glc-DH   Fu<math>\alpha</math>-2 </pre>                                                                                                                                                                                                                                                                                 | Linear A type 2   | -                                             |
| 7                | Ab (& Ab+Fuc)      | <pre> GalNAc<math>\alpha</math>-3Gal<math>\beta</math>-4GlcNAc<math>\beta</math>-3Gal<math>\beta</math>-4GlcNAc<math>\beta</math>-3Gal<math>\beta</math>-4Glc<math>\beta</math>-Cer   Fu<math>\alpha</math>-2 </pre>                                                                                                                                                                                                             | Linear A type 2   | -                                             |
| 8                | Ad (& Ad+Fuc)      | <pre>       GalNAc<math>\alpha</math>-3Gal<math>\beta</math>-4GlcNAc<math>\beta</math>-6         Fu<math>\alpha</math>-2          Gal<math>\beta</math>-4GlcNAc<math>\beta</math>-3Gal<math>\beta</math>-4Glc<math>\beta</math>-Cer                 GalNAc<math>\alpha</math>-3Gal<math>\beta</math>-4GlcNAc<math>\beta</math>-3Gal<math>\beta</math>-4GlcNAc<math>\beta</math>-3                 Fu<math>\alpha</math>-2 </pre> | Branched A type 2 | 24972                                         |
| 9                | B-Hexa-T1          | <pre> Gal<math>\alpha</math>-3Gal<math>\beta</math>-3GlcNAc<math>\beta</math>-3Gal<math>\beta</math>-4Glc-DH   Fu<math>\alpha</math>-2 </pre>                                                                                                                                                                                                                                                                                    | Linear B type 1   | -                                             |
| 10               | B-Hexa-T2          | <pre> Gal<math>\alpha</math>-3Gal<math>\beta</math>-4GlcNAc<math>\beta</math>-3Gal<math>\beta</math>-4Glc-DH   Fu<math>\alpha</math>-2 </pre>                                                                                                                                                                                                                                                                                    | Linear B type 2   | -                                             |

|    |                 |                                                                                                                                                                                                                                                                                                                                                                                                                               |                          |       |
|----|-----------------|-------------------------------------------------------------------------------------------------------------------------------------------------------------------------------------------------------------------------------------------------------------------------------------------------------------------------------------------------------------------------------------------------------------------------------|--------------------------|-------|
| 11 | B-III dodeca    | $\begin{array}{c} \text{Gal}\alpha\text{-3Gal}\beta\text{-4GlcNAc}\beta\text{-6} \\   \\ \text{Fuca}\alpha\text{-2} \qquad \qquad \qquad   \\ \qquad \qquad \qquad \qquad \qquad \text{Gal}\beta\text{-4GlcNAc}\beta\text{-3Gal}\beta\text{-4Glc}\beta\text{-Cer} \\   \\ \text{Gal}\alpha\text{-3Gal}\beta\text{-4GlcNAc}\beta\text{-3} \\   \\ \text{Fuca}\alpha\text{-2} \end{array}$                                      | Branched B type 2        | 33084 |
| 12 | B-IV tetradeca  | $\begin{array}{c} \text{Gal}\alpha\text{-3Gal}\beta\text{-4GlcNAc}\beta\text{-6} \\   \\ \text{Fuca}\alpha\text{-2} \qquad \qquad \qquad   \\ \qquad \qquad \qquad \qquad \qquad \text{Gal}\beta\text{-4GlcNAc}\beta\text{-3Gal}\beta\text{-4Glc}\beta\text{-Cer} \\   \\ \text{Gal}\alpha\text{-3Gal}\beta\text{-4GlcNAc}\beta\text{-3Gal}\beta\text{-4GlcNAc}\beta\text{-3} \\   \\ \text{Fuca}\alpha\text{-2} \end{array}$ | Branched B type 2        | 29777 |
| 13 | PSM-4M-f1       | $\begin{array}{c} \text{Gal}\beta\text{-4GlcNAc}\beta\text{-6} \\   \\ \text{Fuca}\alpha\text{-2} \qquad \qquad \qquad   \\ \qquad \qquad \qquad \qquad \qquad \text{Gal}\beta\text{-4GlcNAc}\beta\text{-OY} \\   \\ \text{GlcNAc}\beta\text{-3} \end{array}$                                                                                                                                                                 | Branched H type 2        | 30415 |
| 14 | MFLNH-I         | $\begin{array}{c} \text{Gal}\beta\text{-4GlcNAc}\beta\text{-6} \\   \\ \text{Gal}\beta\text{-4Glc}\text{-DH} \\   \\ \text{Gal}\beta\text{-3GlcNAc}\beta\text{-3} \\   \\ \text{Fuca}\alpha\text{-2} \end{array}$                                                                                                                                                                                                             | Branched H type 1        | 6     |
| 15 | MSDFLNnH        | $\begin{array}{c} \text{Gal}\beta\text{-4GlcNAc}\beta\text{-6} \\   \qquad   \qquad   \\ \text{Fuca}\alpha\text{-2} \quad \text{Fuca}\alpha\text{-3} \quad \text{Gal}\beta\text{-4Glc}\text{-AO} \\   \\ \text{NeuAc}\alpha\text{-6Gal}\beta\text{-4GlcNAc}\beta\text{-3} \end{array}$                                                                                                                                        | Branched Le <sup>y</sup> | 37    |
| 16 | TFiLNO(1-2,2,3) | $\begin{array}{c} \text{Gal}\beta\text{-3GlcNAc}\beta\text{-3Gal}\beta\text{-4GlcNAc}\beta\text{-6} \\   \qquad \qquad \qquad   \qquad \qquad   \\ \text{Fuca}\alpha\text{-2} \qquad \qquad \text{Fuca}\alpha\text{-3} \qquad \qquad \text{Gal}\beta\text{-4Glc}\text{-DH} \\   \\ \text{Gal}\beta\text{-3GlcNAc}\beta\text{-3} \\   \\ \text{Fuca}\alpha\text{-2} \end{array}$                                               | Branched H type 1        | -     |

<sup>a</sup>Pos, Probe position in the screening microarray.

<sup>b</sup>The oligosaccharide probes are all lipid-linked, neoglycolipids (NGLs) or glycosylceramides. Unless otherwise specified the NGLs are prepared from reducing oligosaccharides by reductive amination with the amino lipid, 1,2-dihexadecyl-*sn*-glycero-3-phosphoethanolamine (DHPE) (Chai,W, et al, Methods Enzymol. 362, 160-195, 2003); AO, NGL prepared from reducing oligosaccharides by oxime ligation with an aminoxy (AO) functionalized DHPE (Liu et al., Chem. Biol. 14, 847-859, 2007); Cer, natural glycolipids with various ceramide moieties; -OY is the 6-linked fragment of core GalNAc after periodate oxidation as further explained in footnote of Table 3.

<sup>c</sup>Less than 1.
